# Supplementary material for: All-zinc coordinated nickel-complexes as molecular mimics for NiZn catalyst surfaces, a density functional theory study
Source: Royal Society of Chemistry journal article supplement (doi:10.1039/c9dt02005e), 2019-01-01
Supplement: c9dt02005e1.pdf [file c9dt02005e1.pdf]

## Supplementary Information

### **All-Zinc Coordinated Nickel-Complexes as Molecular Mimics for NiZn Catalyst Surfaces, a Density Functional Theory Study**

Julius Hornung, Maximilian Muhr, Christian Gemel and Roland A. Fischer\*

Chair of Inorganic and Metal-Organic Chemistry, Technical University of Munich, Lichtenbergstr. 4, 85748 Garching, Germany. E-mail: roland.fischer@tum.de

## Content

|                                                                                            |    |
|--------------------------------------------------------------------------------------------|----|
| Computational Details:.....                                                                | 2  |
| Molecular structures .....                                                                 | 3  |
| [Ni(C <sub>2</sub> H <sub>x</sub> ) <sub>3</sub> ].....                                    | 3  |
| [Ni(PEt <sub>3</sub> ) <sub>n</sub> (C <sub>2</sub> H <sub>x</sub> ) <sub>4-n</sub> ]..... | 4  |
| [Ni(ZnR) <sub>2n</sub> (C <sub>2</sub> H <sub>x</sub> ) <sub>4-n</sub> ] .....             | 5  |
| [Ni(AlCp*) <sub>n</sub> (C <sub>2</sub> H <sub>x</sub> ) <sub>4-n</sub> ] .....            | 7  |
| [Ni(GaCp*) <sub>n</sub> (C <sub>2</sub> H <sub>x</sub> ) <sub>4-n</sub> ].....             | 8  |
| NBO, WBI and EDA-NOCV Results: .....                                                       | 9  |
| Preliminary experimental results: .....                                                    | 12 |
| XYZ-coordinates: .....                                                                     | 14 |

## Computational Details:

Structures of the calculated molecules were optimized using the ORCA4.0<sup>1</sup> software package and Becke's exchange functional<sup>2</sup> with Perdew's correlation functional<sup>3</sup> (BP86). Grimme's Dispersion correction including Becke-Johnson damping (D3BJ)<sup>4,5</sup> was used. After preoptimization and analytical calculation of the Hessian using Ahlrich's def2-SVP basis set, these structures were further optimized using the def2-TZVPP basis sets.<sup>6</sup> Frequency calculations were also performed on this level of theory showing no imaginary frequencies for most cases with the only exception being [Ni(ZnCp\*)(ZnMe)(C<sub>2</sub>H<sub>4</sub>)<sub>3</sub>] (rotation of the Me group at Zn). The resolution of identity approximation (RI) was applied to speed up the calculations.<sup>7</sup> Wiberg indices and NBO charges were computed using the NBO 3.1<sup>8</sup> program as implemented in Gaussian 09<sup>9</sup> program package with single point calculations (BP86/def2-TZVPP). Calculations within the Quantum Theory of Atom in Molecules (QTAIM) were performed using the MULTIWFN package<sup>10</sup>, using Gaussian 09 .wfx files (BP86/def2-TZVPP). Energy Decomposition Analyses with the natural orbital for chemical valence extension (EDA-NOCV)<sup>11-13</sup> were carried out using the ADF (2013.01) program package<sup>14</sup> at the BP86/TZ2P+ level of theory with the previously optimized uncontracted Slater-type orbitals (STOs) were employed as basis functions in self-consistent field (SCF) calculations.<sup>15</sup> Triple-zeta quality basis sets were used which were augmented by two sets of polarization functions (p and d functions for H, d and f for other atoms). An auxiliary set of s, p, d, f and g STOs was used to fit the molecular densities and to represent the Coulomb and exchange potentials accurately in each SCF cycle. Scalar relativistic effects were considered using the zero-order regular approximation (ZORA).<sup>16, 17, 18-20</sup> The bond formation between the interacting fragments is divided into three steps within the EDA calculations. In the first step, these fragments (in the frozen geometry of the whole molecule) are superimposed without electronic relaxation yielding the quasi classical electrostatic attraction  $\Delta E_{elstat}$ . The second step involves anti-symmetrization and normalization of the product wave function which gives the repulsive term  $\Delta E_{pauli}$ . In the final step, the molecular orbitals are allowed to relax which gives the stabilizing orbital interaction  $\Delta E_{orb}$ . This orbital term can be further divided into contributions of different symmetry, representing different bonding situations ( $\sigma$ ,  $\pi$ , etc.). Dispersion forces are accounted for using Grimme's D3 dispersion corrections. These contributions sum up to the total interaction energy  $\Delta E_{int}$ :

$$\Delta E_{int} = \Delta E_{elstat} + \Delta E_{pauli} + \Delta E_{orb} + \Delta E_{disp}$$

## Molecular structures

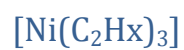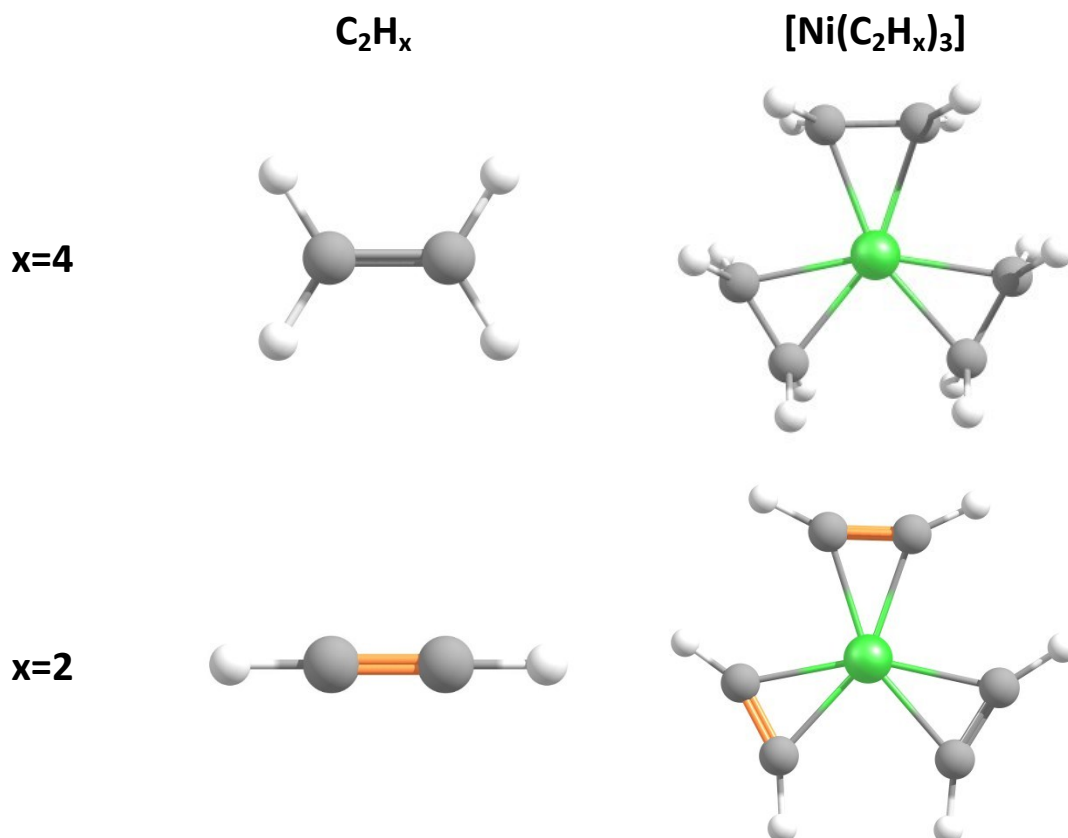

Figure S 1: Optimized Molecular structures (BP86-D3/def2-TZVPP) of  $\text{C}_2\text{H}_x$  and the parent  $[\text{Ni}(\text{C}_2\text{H}_x)_3]$  complexes.

Table S 1: Summary of selected structural parameters of optimized  $\text{C}_2\text{H}_x$  and  $[\text{Ni}(\text{C}_2\text{H}_x)_3]$  (BP86-D3/def2-TZVPP).

| UHC                          | Free ligands           |                        | $[\text{Ni}(\text{C}_2\text{H}_x)_3]$ |                        |
|------------------------------|------------------------|------------------------|---------------------------------------|------------------------|
|                              | $\text{C}_2\text{H}_4$ | $\text{C}_2\text{H}_2$ | $\text{C}_2\text{H}_4$                | $\text{C}_2\text{H}_2$ |
| $d(\text{CC}) [\text{\AA}]$  | 1.33                   | 1.20                   | 1.39                                  | 1.25                   |
| $d(\text{NiC}) [\text{\AA}]$ |                        |                        | 2.05                                  | 1.99                   |

Table S 2: Literature values for calculated structures of  $[\text{Ni}(\text{C}_2\text{H}_x)_3]$  ( $x = 2, 4$ ).

| UHC                          | $[\text{Ni}(\text{C}_2\text{H}_x)_3]$           |                                                        |
|------------------------------|-------------------------------------------------|--------------------------------------------------------|
|                              | $\text{C}_2\text{H}_4^{21}$<br>(ZORA-BP86/TZ2P) | $\text{C}_2\text{H}_2^{22}$<br>(B3LYP/SDD(Ni),631G(d)) |
| $d(\text{CC}) [\text{\AA}]$  | 1.394                                           | 1.248                                                  |
| $d(\text{NiC}) [\text{\AA}]$ | 2.043                                           | 1.992                                                  |

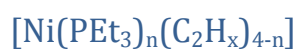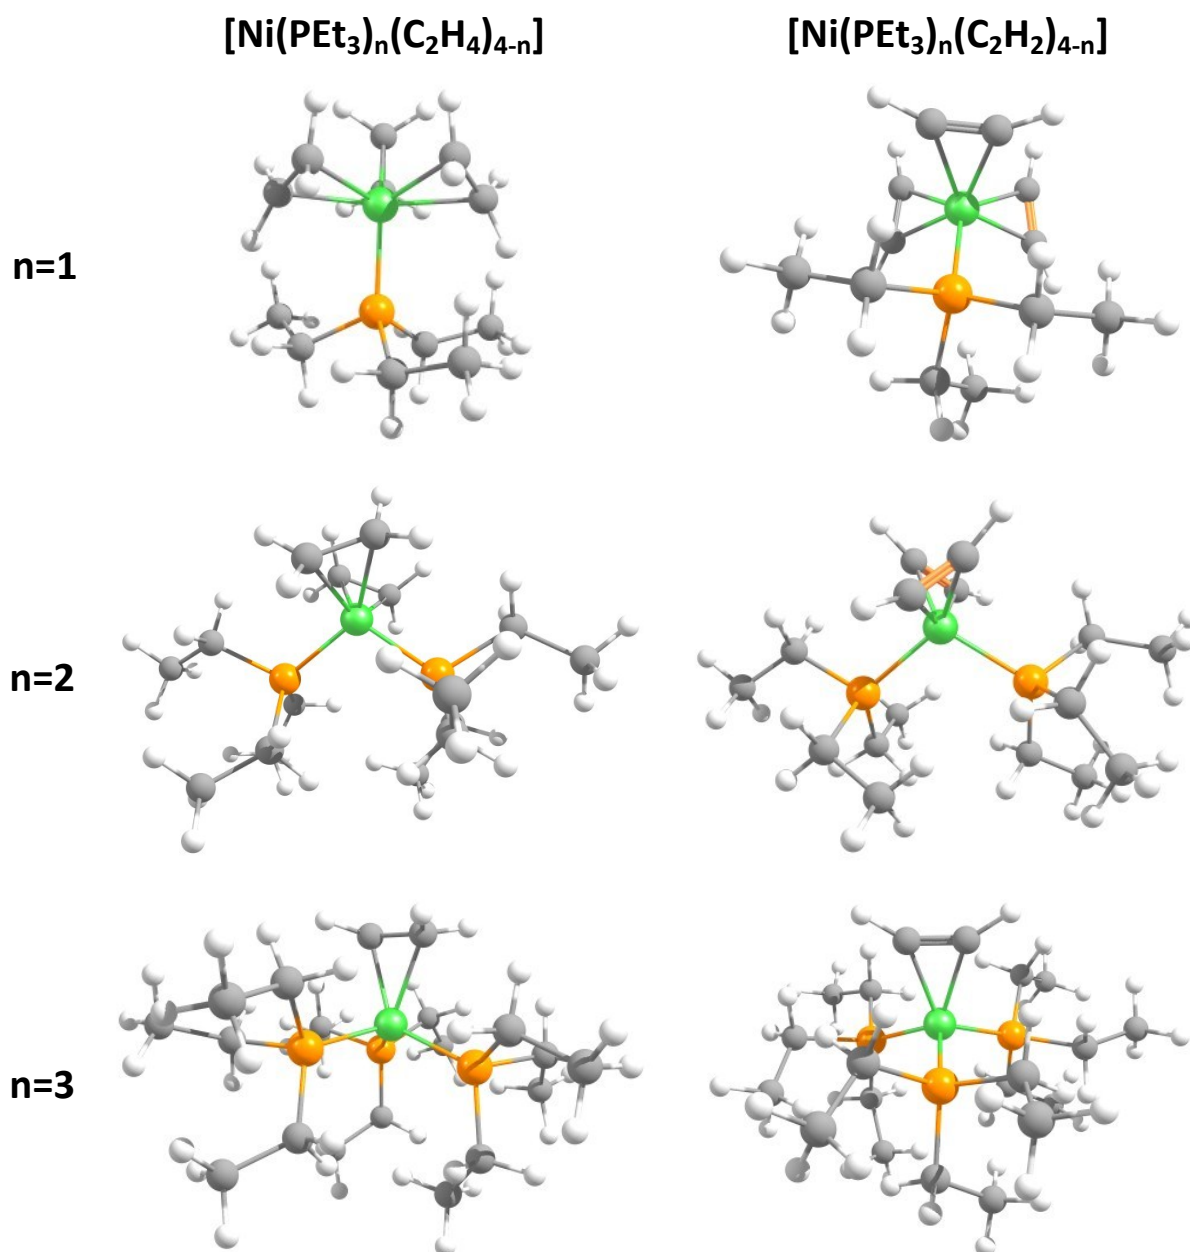

Figure S 2: Optimized Molecular structures (BP86-D3/def2-TZVPP) of  $[\text{Ni}(\text{PEt}_3)_n(\text{C}_2\text{H}_x)_{4-n}]$ .

Table S 3: Summary of selected structural parameters of optimized  $[\text{Ni}(\text{PEt}_3)_n(\text{C}_2\text{H}_x)_{4-n}]$  (BP86-D3/def2-TZVPP).

|                             | $[\text{Ni}(\text{PEt}_3)(\text{C}_2\text{H}_x)_3]$ |                        | $[\text{Ni}(\text{PEt}_3)_2(\text{C}_2\text{H}_x)_2]$ |                        | $[\text{Ni}(\text{PEt}_3)_3(\text{C}_2\text{H}_x)]$ |                        |
|-----------------------------|-----------------------------------------------------|------------------------|-------------------------------------------------------|------------------------|-----------------------------------------------------|------------------------|
|                             | $\text{C}_2\text{H}_4$                              | $\text{C}_2\text{H}_2$ | $\text{C}_2\text{H}_4$                                | $\text{C}_2\text{H}_2$ | $\text{C}_2\text{H}_4$                              | $\text{C}_2\text{H}_2$ |
| $d(\text{C}-\text{C})$ [Å]  | 1.39                                                | 1.25                   | 1.40                                                  | 1.26                   | 1.40                                                | 1.27                   |
| $d(\text{Ni}-\text{C})$ [Å] | 2.08 - 2.12                                         | 2.02 - 2.10            | 2.08                                                  | 1.91 - 2.04            | 2.06                                                | 2.00                   |
| $d(\text{Ni}-\text{P})$ [Å] | 2.21                                                | 2.21                   | 2.17                                                  | 2.21                   | 2.15-2.19                                           | 2.15-2.24              |
| $d(\text{P}-\text{C})$ [Å]  | <3.16                                               | <3.15                  | <3.09                                                 | <3.11                  | <3.02                                               | <3.06                  |

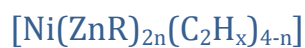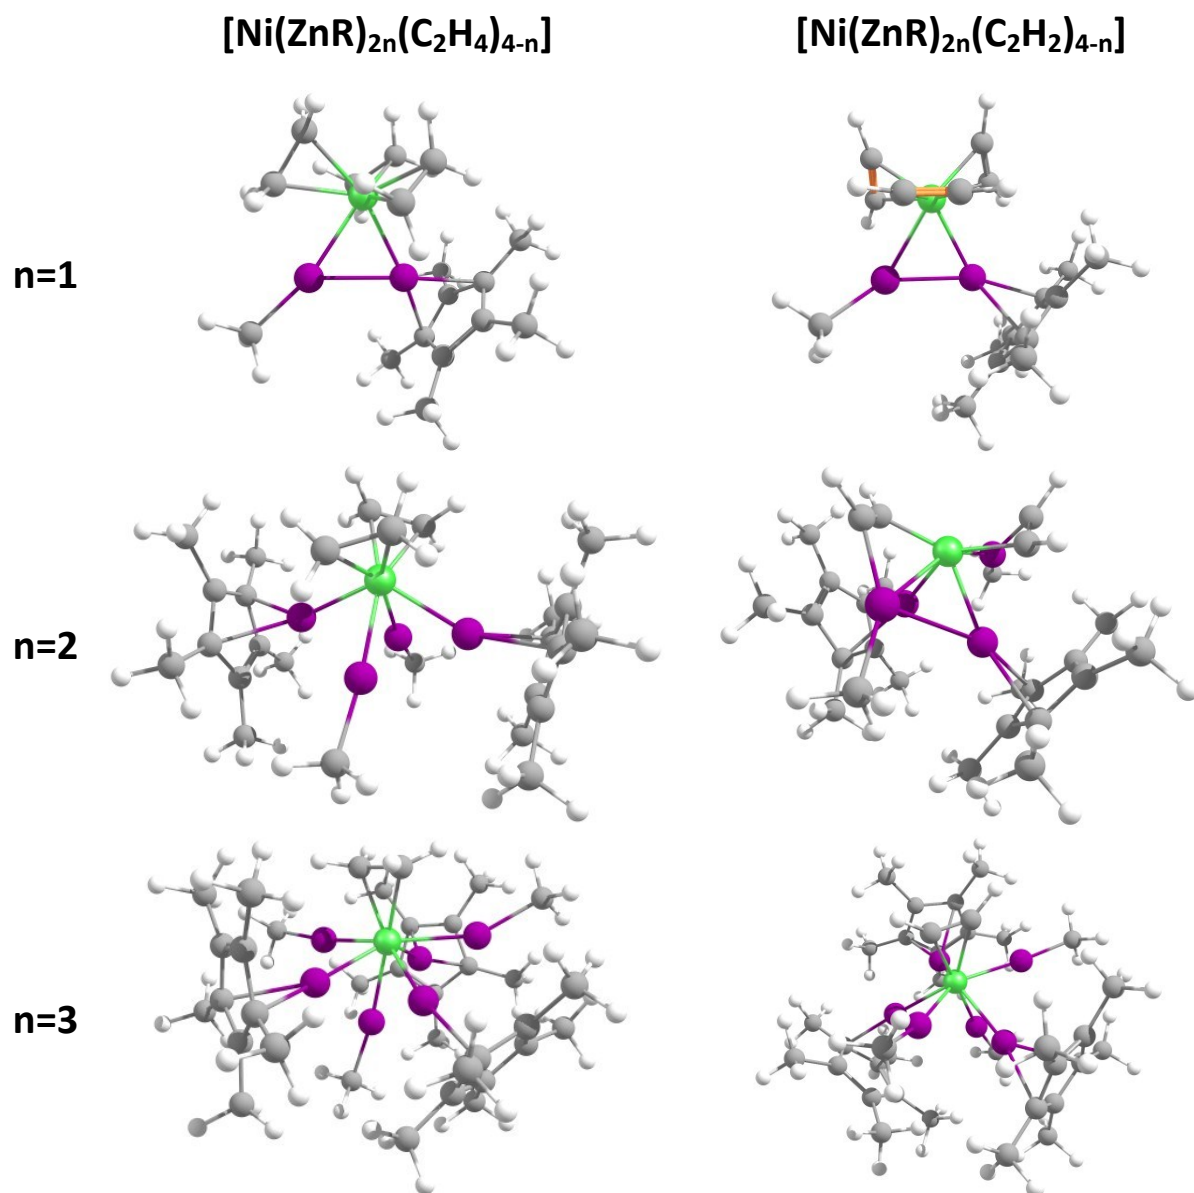

Figure S 3: Optimized Molecular structures (BP86-D3/def2-TZVPP) of  $[\text{Ni}(\text{ZnCp}^*)_n(\text{ZnMe})_n(\text{C}_2\text{H}_x)_{4-n}]$ .

Table S 4: Summary of selected structural parameters of optimized  $[\text{Ni}(\text{ZnCp}^*)_n(\text{ZnMe})_n(\text{C}_2\text{H}_x)_{4-n}]$

(BP86-D3/def2-TZVPP).

|                               | $[\text{Ni}(\text{ZnCp}^*)(\text{ZnMe})(\text{C}_2\text{H}_x)_3]$ |                        | $[\text{Ni}(\text{ZnCp}^*)_2(\text{ZnMe})_2(\text{C}_2\text{H}_x)_2]$ |                        | $[\text{Ni}(\text{ZnCp}^*)_3(\text{ZnMe})_3(\text{C}_2\text{H}_x)]$ |                        |
|-------------------------------|-------------------------------------------------------------------|------------------------|-----------------------------------------------------------------------|------------------------|---------------------------------------------------------------------|------------------------|
|                               | $\text{C}_2\text{H}_4$                                            | $\text{C}_2\text{H}_2$ | $\text{C}_2\text{H}_4$                                                | $\text{C}_2\text{H}_2$ | $\text{C}_2\text{H}_4$                                              | $\text{C}_2\text{H}_2$ |
| $d(\text{C}-\text{C})$ [Å]    | 1.40                                                              | 1.25                   | 1.40                                                                  | 1.34                   | 1.42                                                                | 1.28                   |
| $d(\text{Ni}-\text{C})$ [Å]   | 2.04 - 2.15                                                       | 1.99 - 2.12            | 2.08                                                                  | 1.90 - 2.25            | 2.05                                                                | 1.99                   |
| $d(\text{Ni}-\text{ZnR})$ [Å] | 2.40                                                              | 2.41                   | 2.35                                                                  | 2.30 - 2.43            | 2.33 - 2.38                                                         | 2.31 - 2.39            |
| $d(\text{Zn}-\text{C})$ [Å]   | > 2.41                                                            | > 2.76                 | > 2.95                                                                | 2.03                   | > 2.57                                                              | > 2.55                 |
| $d(\text{Zn}-\text{Zn})$ [Å]  | 2.46                                                              | 2.45                   | > 2.62                                                                | > 2.72                 | > 2.61                                                              | > 2.59                 |

Ni-Zn bridging output structure of  $[\text{Ni}(\text{ZnR})_2(\text{C}_2\text{H}_2)_3]$  (local minimum BP86-D3/def2-TZVPP):

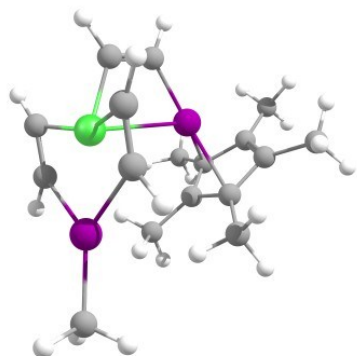

| $[\text{Ni}(\text{ZnCp}^*)(\text{ZnMe})(\text{C}_2\text{H}_2)_3]$ |              |           |
|-------------------------------------------------------------------|--------------|-----------|
|                                                                   | Non-bridging | bridging  |
| $d(\text{C-C}) [\text{\AA}]$                                      | 1.25         | 1.29-1.33 |
| $d(\text{Ni-C}) [\text{\AA}]$                                     | 1.99 - 2.12  | 1.87-2.75 |
| $d(\text{Ni-ZnR}) [\text{\AA}]$                                   | 2.41         | 2.38-3.05 |
| $d(\text{Zn-C}) [\text{\AA}]$                                     | > 2.76       | 1.93-2.27 |
| $d(\text{Zn-Zn}) [\text{\AA}]$                                    | 2.45         | 4.20      |

This structure was obtained when  $\text{C}_2\text{H}_2$  was put into Ni-Zn bridging coordinations before geometry optimization. Both  $[\text{Ni}(\text{ZnR})_2(\text{C}_2\text{H}_2)_3]$  structures are local minima on the potential energy surface. This minimum is about 15kcal/mol more stable. However, the Ni-Zn as well as Zn-Zn distances exceed standard distances.<sup>23</sup> Therefore, this structure was only included in the SI. The values discussed in the manuscript belong to the  $[\text{Ni}(\text{ZnR})_2(\text{C}_2\text{H}_2)_3]$  structure with non-bridging  $\text{C}_2\text{H}_2$  ligands.

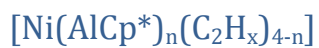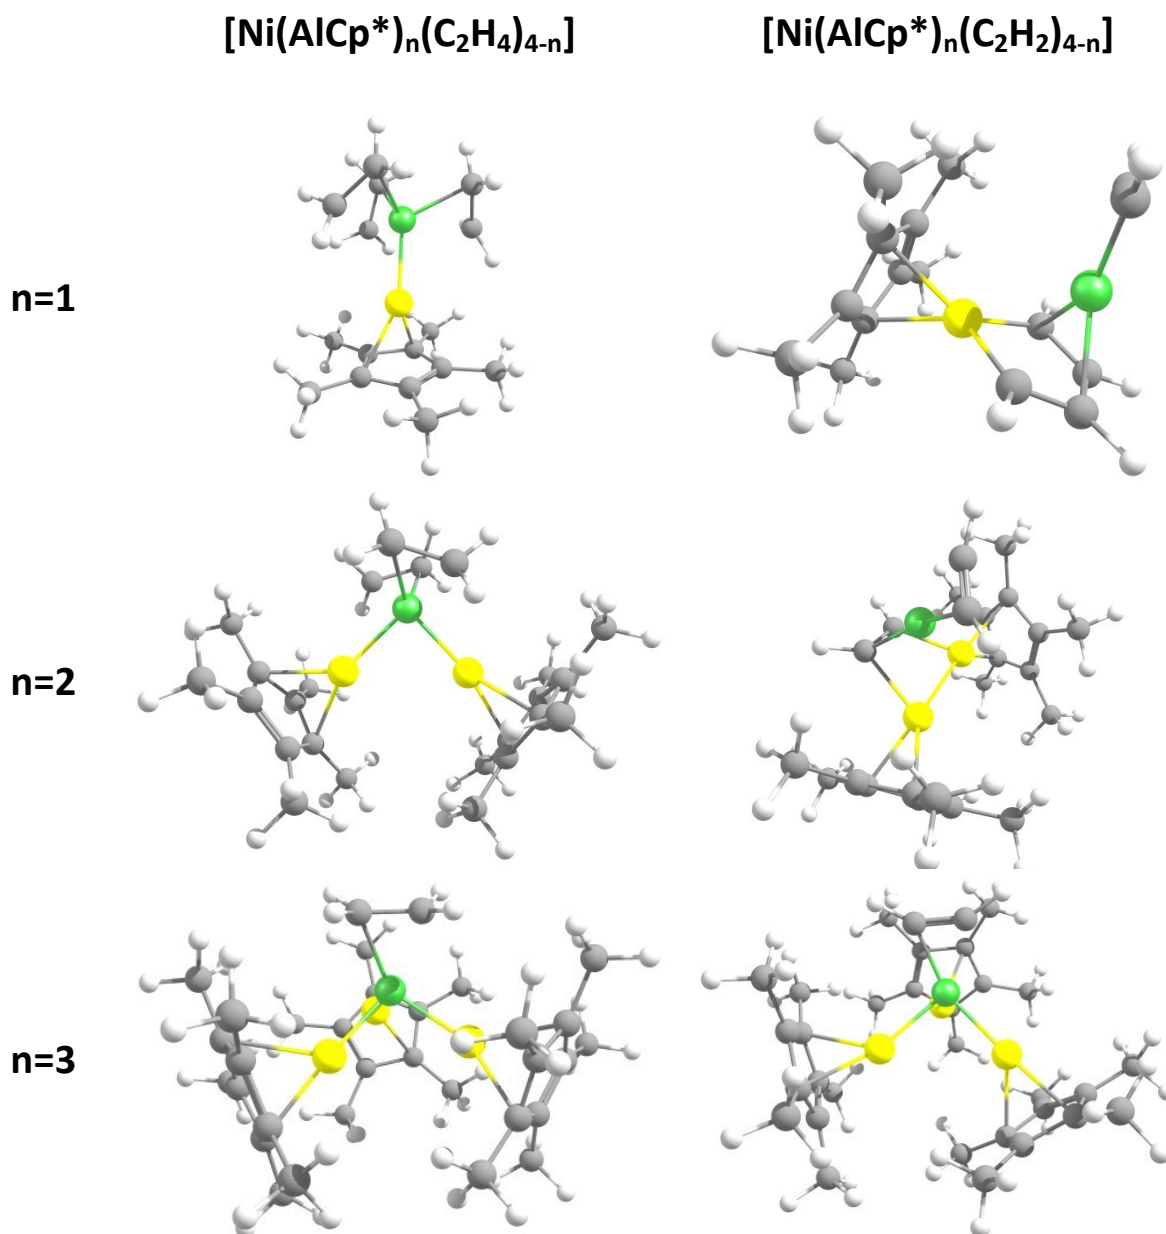

Figure S 4: Optimized Molecular structures (BP86-D3/def2-TZVPP) of  $[\text{Ni}(\text{AlCp}^*)_n(\text{C}_2\text{H}_x)_{4-n}]$ .

Table S 5: Summary of selected structural parameters of optimized  $[\text{Ni}(\text{AlCp}^*)_n(\text{C}_2\text{H}_x)_{4-n}]$  (BP86-D3/def2-TZVPP).

|                        | $[\text{Ni}(\text{AlCp}^*)(\text{C}_2\text{H}_x)_3]$ |                        | $[\text{Ni}(\text{AlCp}^*)_2(\text{C}_2\text{H}_x)_2]$ |                        | $[\text{Ni}(\text{AlCp}^*)_3(\text{C}_2\text{H}_x)]$ |                        |
|------------------------|------------------------------------------------------|------------------------|--------------------------------------------------------|------------------------|------------------------------------------------------|------------------------|
|                        | $\text{C}_2\text{H}_4$                               | $\text{C}_2\text{H}_2$ | $\text{C}_2\text{H}_4$                                 | $\text{C}_2\text{H}_2$ | $\text{C}_2\text{H}_4$                               | $\text{C}_2\text{H}_2$ |
| <b>d(C-C) [Å]</b>      | 1.39-1.40                                            | 1.28-1.47              | 1.41                                                   | 1.27-1.37              | 1.41                                                 | 1.27                   |
| <b>d(Ni-C) [Å]</b>     | 2.05-2.17                                            | 1.86-2.17              | 2.05-2.07                                              | 1.88-2.24              | 2.03                                                 | 1.94                   |
| <b>d(Ni-AlCp*) [Å]</b> | 2.25                                                 | 2.48                   | 2.21                                                   | 2.45-2.60              | 2.20-2.23                                            | 2.22-2.27              |
| <b>d(Al-C) [Å]</b>     | > 2.97                                               | 1.98                   | > 3.01                                                 | 2.04-2.18              | > 3.18                                               | > 3.24                 |
| <b>d(Al-Al) [Å]</b>    |                                                      |                        | 3.12                                                   | 2.50                   | 3.25                                                 | > 3.21                 |



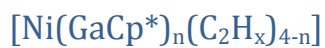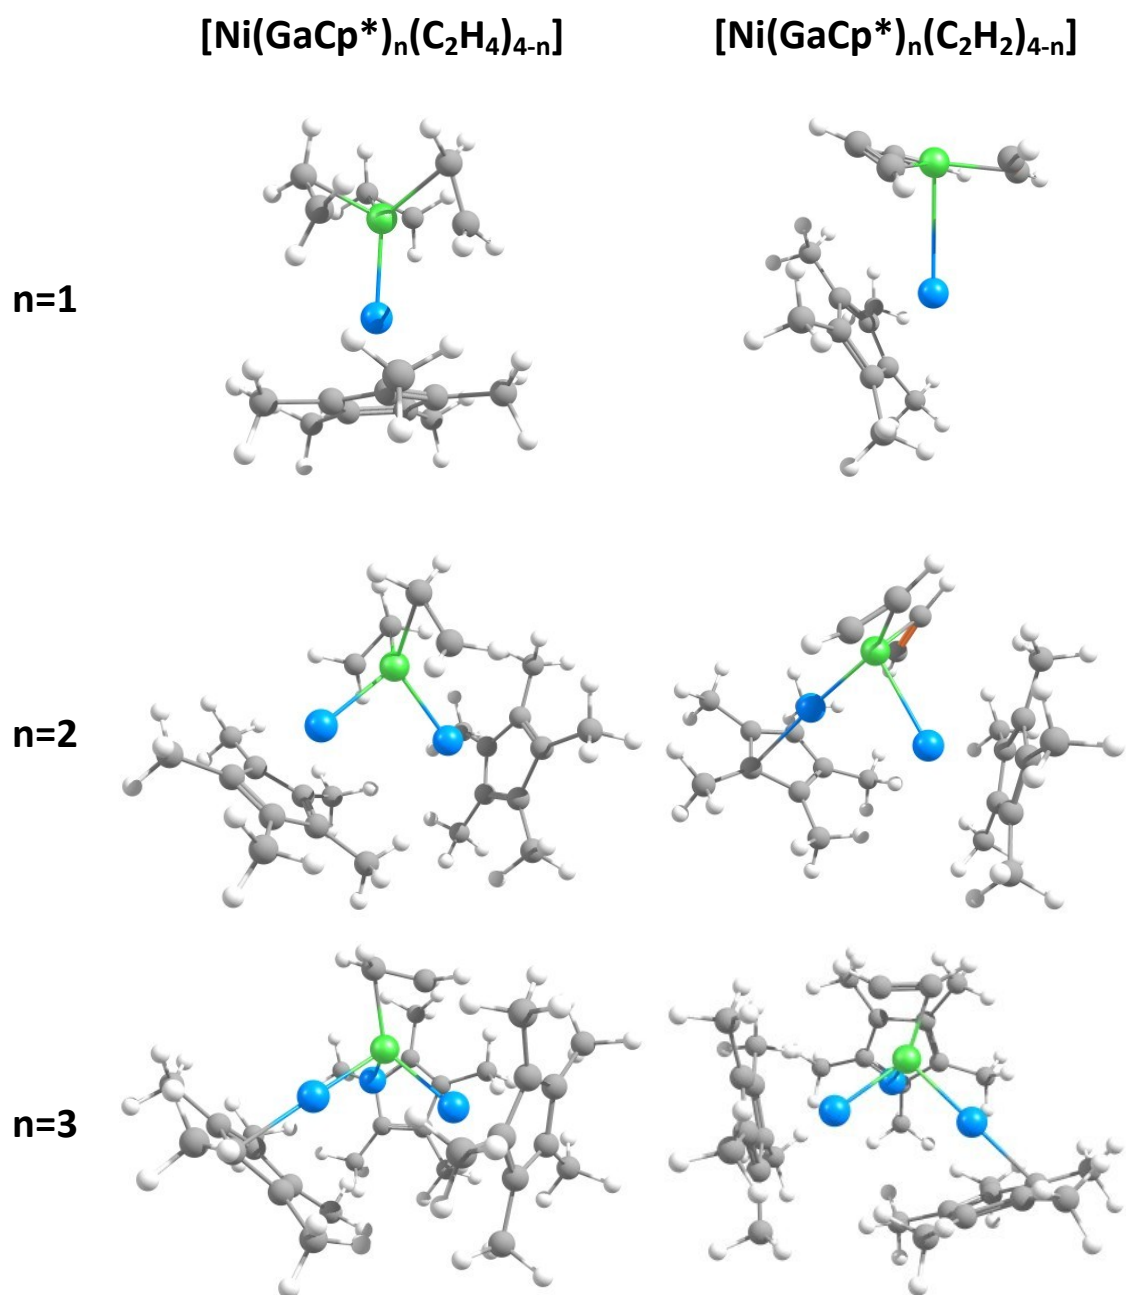

Figure S 5: Optimized Molecular structures (BP86-D3/def2-TZVPP) of  $[\text{Ni}(\text{GaCp}^*)_n(\text{C}_2\text{H}_x)_{4-n}]$ .

Table S 6: Summary of selected structural parameters of optimized  $[\text{Ni}(\text{AlCp}^*)_n(\text{C}_2\text{H}_x)_{4-n}]$  (BP86-D3/def2-TZVPP).

|                           | $[\text{Ni}(\text{GaCp}^*)(\text{C}_2\text{H}_x)_3]$ |                        | $[\text{Ni}(\text{GaCp}^*)_2(\text{C}_2\text{H}_x)_2]$ |                        | $[\text{Ni}(\text{GaCp}^*)_3(\text{C}_2\text{H}_x)]$ |                        |
|---------------------------|------------------------------------------------------|------------------------|--------------------------------------------------------|------------------------|------------------------------------------------------|------------------------|
|                           | $\text{C}_2\text{H}_4$                               | $\text{C}_2\text{H}_2$ | $\text{C}_2\text{H}_4$                                 | $\text{C}_2\text{H}_2$ | $\text{C}_2\text{H}_4$                               | $\text{C}_2\text{H}_2$ |
| $d(\text{C-C})$ [Å]       | 1.39                                                 | 1.25                   | 1.40                                                   | 1.26                   | 1.40                                                 | 1.27                   |
| $d(\text{Ni-C})$ [Å]      | 2.06-2.14                                            | 1.98-2.00              | 2.02-2.08                                              | 1.95-1.97              | 2.02-2.03                                            | 1.93                   |
| $d(\text{Ni-GaCp}^*)$ [Å] | 2.37                                                 | 3.21                   | 2.34-2.37                                              | 2.29, 2.70             | 2.273-2.325                                          | 2.28-2.40              |
| $d(\text{Ga-C})$ [Å]      | >3.10                                                | >3.58                  | >3.10                                                  | >3.02                  | >3.10                                                | >3.27                  |
| $d(\text{Ga-Ga})$ [Å]     |                                                      |                        | 3.39                                                   | 3.31                   | >3.39                                                | >3.32                  |

## NBO, WBI QTAIM and EDA-NOCV Results:

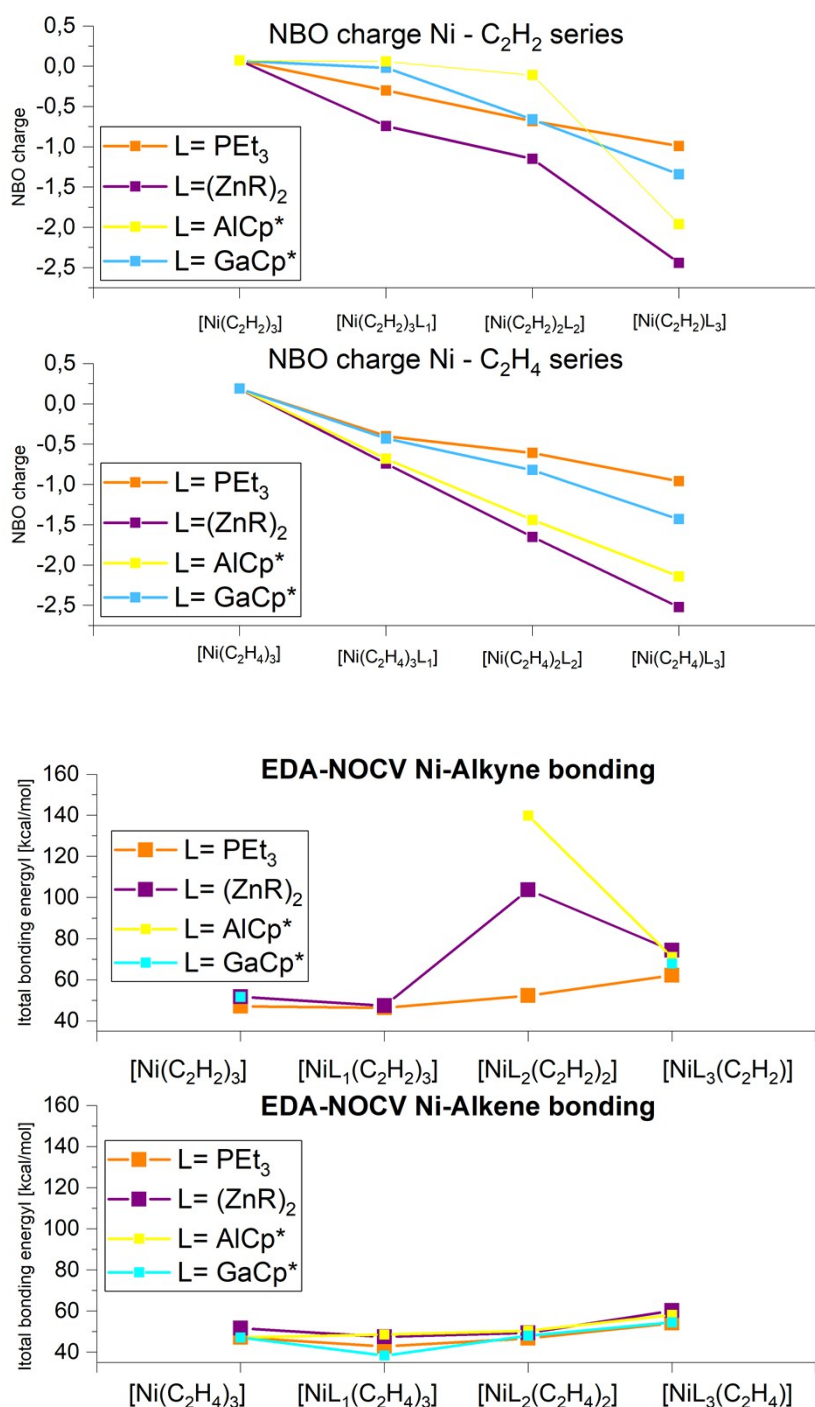

Figure S 6: Top: NBO charges calculated for Ni in [Ni(L)<sub>n</sub>(C<sub>2</sub>H<sub>x</sub>)<sub>4-n</sub>] (L = PEt<sub>3</sub>, AlCp\*, GaCp\*, (ZnR)<sub>2</sub>)  
 Bottom: Results of the EDA-NOCV calculations showing the  $\Delta E_{\text{int}}$  values obtained for (C<sub>2</sub>H<sub>x</sub>) interaction to the respective [NiL<sub>n</sub>(C<sub>2</sub>H<sub>x</sub>)<sub>m</sub>] fragment.

From parent [Ni(C<sub>2</sub>H<sub>x</sub>)<sub>3</sub>] to [Ni(PEt<sub>3</sub>)<sub>n</sub>(C<sub>2</sub>H<sub>x</sub>)<sub>4-n</sub>] without P-C<sub>2</sub>H<sub>x</sub> interaction,  $\Delta E_{\text{int}}$  marginally decreases for [Ni(PEt<sub>3</sub>)<sub>1</sub>(C<sub>2</sub>H<sub>x</sub>)<sub>3</sub>] before it increases with higher numbers of coordinated PEt<sub>3</sub>. As expected,  $\Delta E_{\text{int}}$  is slightly higher for the alkyne series compared to the alkene series, due to higher Ni->C<sub>2</sub>H<sub>x</sub>  $\pi$ -back and C<sub>2</sub>H<sub>x</sub>->Ni  $\sigma$  contributions in the orbital share. The general trend in the Ni-C<sub>2</sub>H<sub>x</sub> total interaction energy is independent of L, i.e. ZnR vs. PEt<sub>3</sub>. (ZnR)<sub>2n</sub> coordination leads to a slightly higher value of  $\Delta E_{\text{int}}$  compared to PEt<sub>3</sub> coordination due to higher

electrostatic and covalent contributions. Again, the NiZn<sub>4</sub> acetylene complex [Ni(ZnR)<sub>4</sub>(C<sub>2</sub>H<sub>2</sub>)<sub>2</sub>] is a special case. Here, ΔE<sub>int</sub> is by far higher than for any other member of the series. When taking a closer look at the electrostatic and covalent contributions to ΔE<sub>int</sub>, a significant feature becomes evident for the NiZn<sub>4</sub> environment. In the side-on coordinated C<sub>2</sub>H<sub>x</sub> in [Ni(PEt<sub>3</sub>)<sub>n</sub>(C<sub>2</sub>H<sub>x</sub>)<sub>4-n</sub>] and [Ni(ZnR)<sub>2n</sub>(C<sub>2</sub>H<sub>x</sub>)<sub>4-n</sub>] (except [Ni(ZnR)<sub>4</sub>(C<sub>2</sub>H<sub>2</sub>)<sub>2</sub>]) the Ni-C<sub>2</sub>H<sub>x</sub> bond is dominated by electrostatic interactions. This situation changes for [Ni(ZnR)<sub>4</sub>(C<sub>2</sub>H<sub>2</sub>)<sub>2</sub>]. Here the covalent contribution slightly exceeds the electrostatic interaction. The preparation energy ΔE<sub>Prep</sub> which summarizes the necessary energy to distort the respective fragments from its relaxed geometry to the geometry in respective compound is also given in Table S7. As evident from the respective structures of the alkyne compounds [Ni(ER)<sub>2</sub>(C<sub>2</sub>H<sub>2</sub>)<sub>2</sub>] (E= Al, Zn), the preparation energy is largest for E= Al, Zn. For both compounds, the alkyne as well as the N(ER)<sub>2</sub> fragment require about the same preparation energy (data not shown), which also points to significant alkyne activation within these compounds. The preparation energy together with the interaction energy yield the bonding interaction ΔE. Taking these values into account the ΔE values are in the same range of about 20kcal/mol for the C<sub>2</sub>H<sub>2</sub> and C<sub>2</sub>H<sub>4</sub> - Ni(ER)<sub>2</sub> interaction.

*Table S 7:* Overview of EDA-NOCV results for [NiL<sub>2</sub>(C<sub>2</sub>H<sub>x</sub>)<sub>2</sub>] (L = PEt<sub>3</sub>, AlCp\*, (ZnR)<sub>2</sub>) and the respective WBI values of the C-C bonds showing distinct C<sub>2</sub>H<sub>x</sub> bonding on NiL<sub>2</sub> fragments.

| L=                                   | [NiL <sub>2</sub> (C <sub>2</sub> H <sub>4</sub> ) <sub>2</sub> ] |                    |        | [NiL <sub>2</sub> (C <sub>2</sub> H <sub>2</sub> ) <sub>2</sub> ] |                    |        |
|--------------------------------------|-------------------------------------------------------------------|--------------------|--------|-------------------------------------------------------------------|--------------------|--------|
|                                      | PEt <sub>3</sub>                                                  | (ZnR) <sub>2</sub> | AlCp*  | PEt <sub>3</sub>                                                  | (ZnR) <sub>2</sub> | AlCp*  |
| ΔE <sub>int</sub> [kcal/mol]         | -46.8                                                             | -49.4              | -50.5  | -52.4                                                             | -103.8             | -139.9 |
| ΔE <sub>Pauli</sub> [kcal/mol]       | 171.4                                                             | 177.0              | 169.3  | 181.2                                                             | 348.3              | 379.7  |
| ΔE <sub>electrostat</sub> [kcal/mol] | -122.5                                                            | -123.6             | -121.4 | -126.9                                                            | -215.7             | -235.3 |
| ΔE <sub>orb</sub> [kcal/mol]         | -85.7                                                             | -89.5              | -89.6  | -97.9                                                             | -225.0             | -275.4 |
| π-type interaction [kcal/mol]        | -54.9                                                             | -48.8              | -55.8  | -63.6                                                             |                    |        |
| σ-type interaction [kcal/mol]        | -20.8                                                             | -27.6              | -23.3  | -23.1                                                             |                    |        |
| ΔE <sub>Disp</sub> [kcal/mol]        | -9.9                                                              | -13.4              | -8.8   | -8.8                                                              | -11.22             | -8.8   |
| ΔE <sub>Prep</sub> [kcal/mol]        | 11.0                                                              | 28.3               | 28.0   | 10.3                                                              | 90.6               | 109.65 |
| WBI (C-C)                            | 1.51                                                              | 1.48               | 1.45   | 2.43                                                              | 1.93               | 1.76   |

Table S 8: Summary of NBO and WBI results for all compounds. Values in parenthesis refer to  $[\text{Ni}(\text{PET}_3)_n(\text{C}_2\text{H}_x)_{4-n}]$ . Values without parenthesis refer to  $[\text{Ni}(\text{ZnCp}^*)_n(\text{ZnMe})_n(\text{C}_2\text{H}_x)_{4-n}]$ .

| NBO charges            | $[\text{Ni}(\text{C}_2\text{H}_x)_3]$ |                        |                        |                        | $[\text{Ni}(\text{L})(\text{C}_2\text{H}_x)_3]$ |                              | $[\text{Ni}(\text{L})_2(\text{C}_2\text{H}_x)_2]$ |                                              | $[\text{Ni}(\text{L})_3(\text{C}_2\text{H}_x)]$ |                        |
|------------------------|---------------------------------------|------------------------|------------------------|------------------------|-------------------------------------------------|------------------------------|---------------------------------------------------|----------------------------------------------|-------------------------------------------------|------------------------|
|                        | $\text{C}_2\text{H}_4$                | $\text{C}_2\text{H}_2$ | $\text{C}_2\text{H}_4$ | $\text{C}_2\text{H}_2$ | $\text{C}_2\text{H}_4$                          | $\text{C}_2\text{H}_2$       | $\text{C}_2\text{H}_4$                            | $\text{C}_2\text{H}_2$                       | $\text{C}_2\text{H}_4$                          | $\text{C}_2\text{H}_2$ |
| Ni                     |                                       |                        | 0.19                   | 0.07                   | -0.74<br>(-0.30)                                | -0.74<br>(-0.40)             | -1.65<br>(-0.61)                                  | -1.15<br>(-0.68)                             | -2.52<br>(-0.96)                                | -2.44<br>(-0.99)       |
| Zn                     |                                       |                        |                        |                        | 0.94                                            | 0.90                         | 0.90 - 0.95                                       | 0.95 - 1.08                                  | 0.79 - 1.06                                     | 0.75 - 1.08            |
| C                      | -0.39                                 | -0.24                  | -0.47                  | -0.25                  | -0.42 - -0.57<br>(-0.45)                        | -0.19 - -0.30<br>(-0.24)     | -0.41<br>(-0.47)                                  | -0.28 (Ni);<br>-0.64 (Zn)<br>(-0.25 - -0.28) | -0.44<br>(-0.47)                                | -0.26<br>(-0.28)       |
| Wiberg bond index (CC) | 2.05                                  | 3.00                   | 1.53                   | 2.43                   | 1.49<br>(1.55)                                  | 2.38 - 2.46<br>(2.45 - 2.50) | 1.48<br>(1.51)                                    | 1.93<br>(2.43)                               | 1.38<br>(1.48)                                  | 2.21<br>(2.37)         |

Table S 9 Summary of EDA-NOCV results for all complexes. Values in parenthesis refer to  $[\text{Ni}(\text{PET}_3)_n(\text{C}_2\text{H}_x)_{4-n}]$ , values without parenthesis refer to  $[\text{Ni}(\text{ZnCp}^*)_n(\text{ZnMe})_n(\text{C}_2\text{H}_x)_{4-n}]$ . The bonding interaction of one  $\text{C}_2\text{H}_x$  fragment with the remaining  $[\text{Ni}(\text{L})_n(\text{C}_2\text{H}_x)_{(4-(n+1))}]$  fragment was investigated.

|                                            | $[\text{Ni}(\text{C}_2\text{H}_x)_3]$ |                        | $[\text{Ni}(\text{L})(\text{C}_2\text{H}_x)_3]$ |                        | $[\text{Ni}(\text{L})_2(\text{C}_2\text{H}_x)_2]$ |                        | $[\text{Ni}(\text{L})_3(\text{C}_2\text{H}_x)]$ |                        |
|--------------------------------------------|---------------------------------------|------------------------|-------------------------------------------------|------------------------|---------------------------------------------------|------------------------|-------------------------------------------------|------------------------|
|                                            | $\text{C}_2\text{H}_4$                | $\text{C}_2\text{H}_2$ | $\text{C}_2\text{H}_4$                          | $\text{C}_2\text{H}_2$ | $\text{C}_2\text{H}_4$                            | $\text{C}_2\text{H}_2$ | $\text{C}_2\text{H}_4$                          | $\text{C}_2\text{H}_2$ |
| Total Bonding Energy [kcal/mol]            | -47.2                                 | -51.7                  | -47.5<br>(-42.9)                                | -47.4<br>(-46.4)       | -49.4<br>(-46.8)                                  | -103.8<br>(-52.4)      | -60.3<br>(-54.2)                                | -74.3<br>(-62.2)       |
| Total Pauli Repulsion [kcal/mol]           | 130.74                                | 134.6                  | 191.8<br>(146.1)                                | 208.6<br>(180.8)       | 177.0<br>(171.4)                                  | 348.3<br>(181.2)       | 181.6<br>(177.1)                                | 197.7<br>(181.6)       |
| Total Electrostatic Interaction [kcal/mol] | -99.5                                 | -101.58                | -132.3<br>(-103.9)                              | -140.9<br>(-126.2)     | -123.6<br>(-122.5)                                | -215.7<br>(-126.9)     | -128.8<br>(-126.7)                              | -137.4<br>(-128.9)     |
| Total Orbital Interaction [kcal/mol]       | -73.2                                 | -80.17                 | -97.4<br>(-74.4)                                | -105.1<br>(-91.9)      | -89.5<br>(-85.7)                                  | -225.0<br>(-97.9)      | -98.5<br>(-92.9)                                | -121.5<br>(-104.7)     |
| $\pi$ -type interaction                    | -41.9                                 | -47.3                  | -56.3<br>(-42.1)                                | -58.5<br>(-56.6)       | -48.8<br>(-54.9)                                  |                        | -53.4<br>(-59.63)                               | -71.6<br>(-70.7)       |
| $\sigma_{\text{back}}$ -type interaction   | -22.5                                 | -22.0                  | -28.0<br>(-21.9)                                | -31.5<br>(-24.5)       | -27.6<br>(-20.8)                                  |                        | -30.3<br>(-21.26)                               | -31.1<br>(-21.5)       |

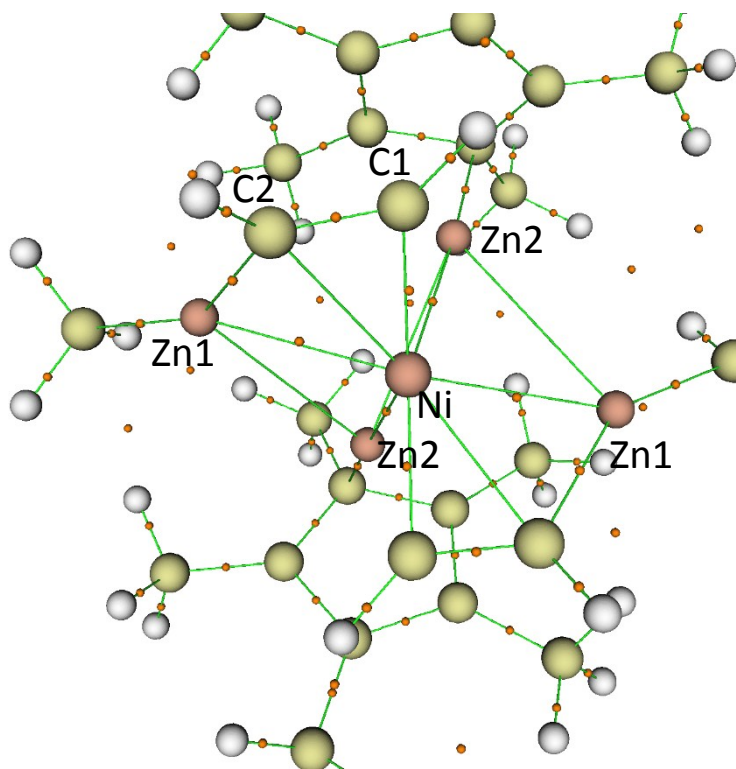

Figure S 7: QTAIM results showing bond paths (green) and bond critical points (orange dots) for  $[\text{Ni}(\text{ZnR})_4(\text{C}_2\text{H}_2)_2]$  showing Ni-Zn bonding interactions for all NiZn interactions.

## Preliminary experimental results:

### Synthetic protocols.

Proofs for reductive elimination of H-SiEt<sub>3</sub> from [(H)(SiEt<sub>3</sub>)NiL<sub>n</sub>] complexes (L = AlCp\*, ZnR) as a potential approach to attach unsaturated hydrocarbons to [NiL<sub>n</sub>] fragments.

**[(H)(SiEt<sub>3</sub>)Ni(AlCp\*)<sub>3</sub>]<sup>24</sup>.** [Ni(cod)<sub>2</sub>] (204 mg, 0.74 mmol, 1.0 eq.) and AlCp\* (355 mg, 2.19 mmol, 3.0 eq.) was suspended in triethylsilane (5 mL) and heated to 75 °C for 3 hours. The mixture was cooled to ambient temperature and all volatiles were removed in vacuo. The brownish residue was washed with hexane (2.5 mL), filtered and dried under vacuo. The solid was *Whatman*-filtered with boiling hexane (8 mL, removal of residual AlCp\*). The filtrate was dried to obtain a yellowish brown powder of AlCp\* free [(H)(SiEt<sub>3</sub>)Ni(AlCp\*)<sub>3</sub>]. Yield: 200 mg, (0.30 mmol, 41%). <sup>1</sup>H NMR (400 MHz, 298 K, C<sub>6</sub>D<sub>6</sub>): δ (ppm) = 1.89 (s, 45 H), 1.27 (t, <sup>3</sup>J = 7.8 Hz, 9 H), 0.85 (q, <sup>3</sup>J = 7.8 Hz, 6 H), -12.79 (s, 1 H).

**[Ni(PEt<sub>3</sub>)(AlCp\*)<sub>3</sub>]<sup>25</sup>.** A sample of [(H)(SiEt<sub>3</sub>)Ni(AlCp\*)<sub>3</sub>] (200 mg, 0.30 mmol, 1 eq.) was suspended in 5 mL n-hexane and a sample of PEt<sub>3</sub> (0.087 ml, 0.60 mmol, 2 eq.) was added. The yellow suspension was stirred at 60 °C for 1.5 h. After cooling to room temperature, all volatile components were removed *in vacuo* resulting in a yellow solid, which was re-crystallized, from cold n-hexane (2 mL). The solvent was removed with a cannula, the remaining yellow crystalline solid was dried. Yield: 133 mg (0.20 mmol, 65%). <sup>1</sup>H-NMR (400.1 MHz, C<sub>6</sub>D<sub>6</sub>, 298 K): δ = 1.98 (s, 45H), 1.05 (m, 6H), 0.99 (m, 9H) ppm; <sup>13</sup>C-NMR (100.6 MHz, C<sub>6</sub>D<sub>6</sub>, 298K): δ = 112.8 (s, C<sub>5</sub>Me<sub>5</sub>), 29.0 (d, J=17.7 Hz, CH<sub>2</sub>), 10.4 (d, J=4.9 Hz, CH<sub>3</sub>) 10.3 (s, C<sub>5</sub>Me<sub>5</sub>) ppm; <sup>27</sup>Al-NMR (104.6 MHz, C<sub>6</sub>D<sub>6</sub>, 298K): δ = -53.1(s) ppm; <sup>31</sup>P-NMR (162.0 MHz, C<sub>6</sub>D<sub>6</sub>, 298K): δ = 61.9 (s) ppm; IR (cm<sup>-1</sup>): 2949, 2911, 2860, 1451, 1426, 1375, 1258, 1023, 800, 762, 722, 662, 620, 584, 560, 599, 453, 440. Elemental anal. calcd for C<sub>36</sub>H<sub>60</sub>Al<sub>3</sub>NiP: C, 65.17; H, 9.12; Al, 12.20; P, 4.67; Ni, 8.85, found: C, 64.75; H, 9.01; Al, 12.0; P, 4.41; Ni, 8.3.

**[(H)(SiEt<sub>3</sub>)Ni(ZnCp\*)<sub>2</sub>(ZnMe)<sub>2</sub>(AlCp\*)] (to be published).** ZnMe<sub>2</sub> (77 mg, 0.807 mmol, 5.3 eq.) was added dropwise as a solution in toluene (5 mL) with a cooled (-50 °C) addition funnel to a solution of [Ni(AlCp\*)<sub>3</sub>(H)(SiEt<sub>3</sub>)] (100 mg, 0.151 mmol, 1.0 eq.) in toluene (3 mL) over 15 min. After stirring for 3 h at -50 °C, the mixture was concentrated for 1 h to reach about 50% of the volume (at -50 °C). The volatiles were removed under vacuo while the mixture was allowed to reach r.t. to obtain a dark green residue. <sup>1</sup>H NMR (400 MHz, 298 K, C<sub>6</sub>D<sub>6</sub>): δ (ppm) = 2.18 (s, 30 H, H<sub>ZnCp\*</sub>), 1.76 (s, 15 H, H<sub>AlCp\*</sub>), 1.07 (t, <sup>3</sup>J = 7.8 Hz, 9 H, H<sub>SiEt3</sub>), 0.70 (q, <sup>3</sup>J = 7.7 Hz, 6 H, H<sub>SiEt3</sub>), -0.10 (s, 6 H, H<sub>ZnMe</sub>), -12.0 (s, 1 H, H<sub>Ni-H</sub>). LIFDI MS (toluene): [M]<sup>+</sup>: 898.56 (calculated: 898.13).

**[(PEt<sub>3</sub>)Ni(ZnCp<sup>\*</sup>)<sub>2</sub>(ZnMe)<sub>2</sub>(AlCp<sup>\*</sup>)] (to be published).** PEt<sub>3</sub> (77 mg, 0.807 mmol, 5.3 eq.) was added to a solution of [Ni(AlCp<sup>\*</sup>)<sub>1</sub>(ZnCp<sup>\*</sup>)<sub>2</sub>(ZnMe)<sub>2</sub>(H)(SiEt<sub>3</sub>)] (100 mg, 0.151 mmol, 1.0 eq.) in C<sub>6</sub>D<sub>6</sub> and heated to 80°C for 5 min. <sup>1</sup>H NMR (400 MHz, 298 K, C<sub>6</sub>D<sub>6</sub>): δ (ppm) = 2.24 (s, 30 H, H<sub>ZnCp<sup>\*</sup></sub>), 1.80 (s, 15 H, H<sub>AlCp<sup>\*</sup></sub>), 1.42 (m, 6 H, H<sub>PEt<sub>3</sub></sub>), 0.80 (m, 9 H, H<sub>PEt<sub>3</sub></sub>), -0.08 (s, 6 H, H<sub>ZnMe</sub>). <sup>31</sup>P NMR (162 MHz, 298 K, C<sub>6</sub>D<sub>6</sub>): 46.4 ppm.

## XYZ-coordinates:

### [Ni(PEt<sub>3</sub>)(C<sub>2</sub>H<sub>4</sub>)<sub>3</sub>]:

|    |           |           |           |
|----|-----------|-----------|-----------|
| Ni | -0.440397 | -0.080555 | -0.225277 |
| P  | -2.630312 | 0.183735  | -0.342301 |
| C  | -3.138492 | -1.033940 | -2.929598 |
| C  | -3.468615 | 0.136883  | -2.004921 |
| C  | -2.763578 | 3.044876  | -0.409166 |
| C  | -3.355374 | 1.796769  | 0.244537  |
| C  | -3.440652 | -2.427527 | 0.581490  |
| C  | -3.712879 | -0.927122 | 0.692227  |
| C  | 0.029998  | 1.103013  | -1.919593 |
| C  | 1.197384  | 0.612807  | -1.341368 |
| C  | -0.166658 | 1.344879  | 1.268591  |
| C  | 0.318603  | 0.121196  | 1.720730  |
| C  | 0.301005  | -2.032738 | 0.015044  |
| C  | -0.415661 | -1.945039 | -1.173366 |
| H  | -2.062885 | -1.083929 | -3.134002 |
| H  | -3.660878 | -0.922065 | -3.890135 |
| H  | -3.442000 | -1.997775 | -2.501054 |
| H  | -3.175305 | 1.076493  | -2.496970 |
| H  | -4.554890 | 0.200060  | -1.828134 |
| H  | -1.684450 | 3.111145  | -0.225944 |
| H  | -3.233948 | 3.954327  | -0.010305 |
| H  | -2.916284 | 3.045872  | -1.496720 |
| H  | -3.206331 | 1.832786  | 1.334187  |
| H  | -4.444799 | 1.752658  | 0.083570  |
| H  | -3.642034 | -2.808118 | -0.428226 |
| H  | -4.078873 | -2.990373 | 1.276925  |
| H  | -2.395979 | -2.657602 | 0.824939  |
| H  | -4.767413 | -0.701349 | 0.462182  |
| H  | -3.540239 | -0.599921 | 1.729871  |
| H  | -0.284109 | 2.131923  | -1.749209 |
| H  | -0.389862 | 0.632065  | -2.808811 |
| H  | 1.815959  | 1.247456  | -0.705533 |
| H  | 1.710288  | -0.251514 | -1.765766 |
| H  | -1.116206 | 1.725287  | 1.640617  |
| H  | 0.512537  | 2.106605  | 0.883551  |
| H  | -0.265525 | -0.482756 | 2.415013  |
| H  | 1.384958  | -0.099196 | 1.694351  |
| H  | -0.136297 | -2.512853 | 0.890321  |
| H  | 1.388055  | -1.963767 | 0.019721  |
| H  | -1.405909 | -2.387235 | -1.247251 |
| H  | 0.097120  | -1.804298 | -2.125853 |

### [Ni(PEt<sub>3</sub>)(C<sub>2</sub>H<sub>2</sub>)<sub>3</sub>]:

|    |           |           |           |
|----|-----------|-----------|-----------|
| Ni | -0.508432 | -0.080146 | -0.237149 |
| P  | -2.697611 | 0.199964  | -0.374937 |
| C  | -0.380614 | -2.049586 | -0.972550 |
| C  | 0.667356  | -1.776313 | -0.354879 |
| C  | -0.397152 | -0.142158 | 1.784073  |

|   |           |           |           |
|---|-----------|-----------|-----------|
| C | -0.163997 | 1.038182  | 1.429598  |
| C | 0.935669  | 0.969710  | -1.279035 |
| C | -0.098520 | 1.001629  | -1.975774 |
| C | -3.717549 | -0.868775 | 0.744921  |
| C | -3.494826 | -2.371480 | 0.571183  |
| C | -3.256271 | 1.860162  | 0.230367  |
| C | -2.615897 | 3.030859  | -0.516286 |
| C | -3.578475 | 0.104300  | -2.005564 |
| C | -3.124289 | -1.040278 | -2.913021 |
| H | 1.643000  | -1.919948 | 0.076628  |
| H | -1.047714 | -2.664033 | -1.549788 |
| H | 1.955103  | 1.161812  | -0.992256 |
| H | -0.695770 | 1.265396  | -2.831274 |
| H | -0.494772 | -0.959237 | 2.481564  |
| H | 0.097599  | 2.074367  | 1.574697  |
| H | -3.424542 | -0.564258 | 1.762021  |
| H | -4.780386 | -0.603106 | 0.624695  |
| H | -2.428943 | -2.617508 | 0.664070  |
| H | -4.048026 | -2.940847 | 1.331043  |
| H | -3.834009 | -2.721718 | -0.412914 |
| H | -4.356421 | 1.912331  | 0.191806  |
| H | -2.967534 | 1.888748  | 1.291972  |
| H | -2.929969 | 3.064080  | -1.568904 |
| H | -2.899031 | 3.989847  | -0.060829 |
| H | -1.521308 | 2.948377  | -0.501447 |
| H | -4.663241 | 0.062872  | -1.818040 |
| H | -3.384404 | 1.066085  | -2.504323 |
| H | -3.364652 | -2.020752 | -2.481656 |
| H | -3.613932 | -0.981653 | -3.895067 |
| H | -2.037704 | -1.003359 | -3.065694 |

### [Ni(PEt<sub>3</sub>)<sub>2</sub>(C<sub>2</sub>H<sub>4</sub>)<sub>2</sub>]:

|    |           |           |           |
|----|-----------|-----------|-----------|
| Ni | -0.172959 | 3.607152  | 4.339062  |
| P  | 0.037126  | 2.482119  | 2.494919  |
| P  | -0.128507 | 2.177786  | 5.975297  |
| C  | 1.113776  | 5.129552  | 3.765510  |
| C  | 1.559777  | 4.572973  | 4.970766  |
| C  | -1.645979 | 4.851303  | 5.098386  |
| C  | -2.000100 | 4.440215  | 3.807430  |
| C  | -2.873898 | 1.550728  | 6.164617  |
| C  | -0.393193 | 2.108992  | 8.884932  |
| C  | 1.503689  | -0.049790 | 5.197928  |
| C  | 2.077015  | 0.750937  | 1.252417  |
| C  | 0.062165  | 3.065040  | -0.394898 |
| C  | -1.353778 | 0.297318  | 1.059593  |
| C  | -0.167742 | 2.988211  | 7.654119  |
| C  | 1.369399  | 1.094246  | 6.202695  |
| C  | -0.493548 | 3.433605  | 0.983185  |
| C  | -0.964384 | 0.912454  | 2.406232  |
| C  | 1.796946  | 2.000495  | 2.090147  |
| C  | -1.484278 | 0.913384  | 6.122598  |
| H  | 1.360655  | 5.078340  | 5.916635  |



|                                                                                      |           |           |           |                                                                        |           |           |           |
|--------------------------------------------------------------------------------------|-----------|-----------|-----------|------------------------------------------------------------------------|-----------|-----------|-----------|
| H                                                                                    | 0.549576  | 6.064208  | 3.760171  | C                                                                      | -0.768753 | 2.199526  | 8.922306  |
| H                                                                                    | 1.643605  | 4.917317  | 2.835231  | C                                                                      | -2.877700 | 1.445383  | 5.753882  |
| H                                                                                    | 2.424589  | 3.906623  | 4.977947  | C                                                                      | -1.700738 | 4.484895  | 4.167900  |
| H                                                                                    | -1.851491 | 5.107739  | 2.957799  | C                                                                      | -1.059805 | 5.053798  | 5.089281  |
| H                                                                                    | -1.207613 | 5.836897  | 5.267151  | C                                                                      | 2.024437  | 3.993060  | 4.770539  |
| H                                                                                    | -2.158903 | 4.429793  | 5.963279  | C                                                                      | 1.600688  | 4.736439  | 3.844484  |
| H                                                                                    | -2.777432 | 3.686960  | 3.662514  | H                                                                      | 2.807900  | 3.693370  | 5.451186  |
| H                                                                                    | 0.350524  | 1.304316  | 8.965136  | H                                                                      | 1.700438  | 5.551978  | 3.142765  |
| H                                                                                    | -1.386907 | 1.641563  | 8.873091  | H                                                                      | -0.886597 | 5.823152  | 5.825935  |
| H                                                                                    | -0.324356 | 2.707100  | 9.804930  | H                                                                      | -2.566944 | 4.411429  | 3.527375  |
| H                                                                                    | -3.037921 | 2.183429  | 5.282504  | H                                                                      | -1.679773 | 0.907825  | 3.152527  |
| H                                                                                    | -3.001293 | 2.185931  | 7.052191  | H                                                                      | -0.161186 | 0.049860  | 2.993722  |
| H                                                                                    | -3.662780 | 0.786238  | 6.188260  | H                                                                      | -0.539964 | 4.406505  | 1.389214  |
| H                                                                                    | 1.486687  | 0.318865  | 4.165747  | H                                                                      | -1.831180 | 3.231209  | 1.271656  |
| H                                                                                    | 0.690390  | -0.779718 | 5.306110  | H                                                                      | 2.392968  | 1.958513  | 2.756342  |
| H                                                                                    | 2.450627  | -0.588851 | 5.340761  | H                                                                      | 2.099109  | 2.986411  | 1.385023  |
| H                                                                                    | -0.210859 | 2.048347  | -0.700029 | H                                                                      | 1.013053  | 0.413672  | 7.391586  |
| H                                                                                    | 1.157608  | 3.138299  | -0.418111 | H                                                                      | 2.060733  | 1.762398  | 6.928116  |
| H                                                                                    | -0.324238 | 3.755592  | -1.158877 | H                                                                      | -1.370479 | 3.672007  | 7.432479  |
| H                                                                                    | 1.667271  | 0.832414  | 0.238803  | H                                                                      | 0.343261  | 3.696684  | 7.789142  |
| H                                                                                    | 1.645431  | -0.146760 | 1.715909  | H                                                                      | -1.506417 | 0.274756  | 6.987286  |
| H                                                                                    | 3.160055  | 0.581949  | 1.161591  | H                                                                      | -1.231432 | 0.123691  | 5.250647  |
| H                                                                                    | -0.480431 | -0.012973 | 0.474433  | H                                                                      | -1.872514 | -0.792909 | 1.353945  |
| H                                                                                    | -1.934269 | 1.002845  | 0.451154  | H                                                                      | -2.046891 | 0.825379  | 0.661420  |
| H                                                                                    | -1.982176 | -0.592046 | 1.214895  | H                                                                      | -0.528491 | -0.067012 | 0.455617  |
| H                                                                                    | -1.399421 | 0.265873  | 5.238757  | H                                                                      | 3.089783  | 0.767261  | 0.695112  |
| H                                                                                    | -1.312566 | 0.275054  | 7.003780  | H                                                                      | 1.706562  | -0.087388 | 1.392717  |
| H                                                                                    | 0.792465  | 3.521248  | 7.726196  | H                                                                      | 1.481600  | 0.952538  | -0.025980 |
| H                                                                                    | -0.934237 | 3.772713  | 7.598460  | H                                                                      | -0.889678 | 3.790866  | -0.998795 |
| H                                                                                    | 2.235190  | 1.769012  | 6.130806  | H                                                                      | 0.717186  | 3.254461  | -0.489948 |
| H                                                                                    | 1.364169  | 0.688263  | 7.225678  | H                                                                      | -0.597324 | 2.077732  | -0.652160 |
| H                                                                                    | 2.238490  | 2.890575  | 1.615423  | H                                                                      | 2.740335  | -0.310280 | 5.680075  |
| H                                                                                    | 2.298081  | 1.917554  | 3.064780  | H                                                                      | 1.105351  | -0.471720 | 5.016207  |
| H                                                                                    | -1.593759 | 3.398478  | 0.985113  | H                                                                      | 2.110940  | 0.913303  | 4.550290  |
| H                                                                                    | -0.234654 | 4.475909  | 1.219181  | H                                                                      | -3.645624 | 0.666938  | 5.645042  |
| H                                                                                    | -0.426233 | 0.180449  | 3.026611  | H                                                                      | -3.195230 | 2.118685  | 6.561757  |
| H                                                                                    | -1.873318 | 1.162552  | 2.973542  | H                                                                      | -2.852024 | 2.043329  | 4.833002  |
|                                                                                      |           |           |           | H                                                                      | -0.943223 | 2.859118  | 9.784602  |
|                                                                                      |           |           |           | H                                                                      | -1.654326 | 1.557878  | 8.819555  |
|                                                                                      |           |           |           | H                                                                      | 0.083818  | 1.553380  | 9.171684  |
| [Ni(PEt <sub>3</sub> ) <sub>2</sub> (C <sub>2</sub> H <sub>2</sub> ) <sub>2</sub> ]: |           |           |           | [Ni(PEt <sub>3</sub> ) <sub>3</sub> (C <sub>2</sub> H <sub>4</sub> )]: |           |           |           |
| Ni                                                                                   | 0.084059  | 3.527512  | 4.391915  | Ni                                                                     | -0.436091 | -0.210776 | 0.028325  |
| P                                                                                    | -0.159100 | 2.120194  | 6.071476  | P                                                                      | 0.035870  | 0.976972  | 1.786585  |
| P                                                                                    | 0.057724  | 2.387866  | 2.497922  | P                                                                      | 0.279933  | 0.647989  | -1.864063 |
| C                                                                                    | -1.503779 | 0.837788  | 6.040816  | P                                                                      | 0.372305  | -2.207266 | 0.118765  |
| C                                                                                    | 1.770844  | 2.046331  | 1.853906  | C                                                                      | -2.356033 | -0.931285 | -0.202994 |
| C                                                                                    | -0.830312 | 0.751859  | 2.472098  | C                                                                      | -2.382686 | 0.461907  | -0.028104 |
| C                                                                                    | -0.746679 | 3.358494  | 1.127177  | C                                                                      | 3.140105  | -1.630608 | 0.645592  |
| C                                                                                    | 1.291369  | 1.070670  | 6.553405  | C                                                                      | 2.193013  | -2.569861 | -0.096455 |
| C                                                                                    | -0.513967 | 3.018631  | 7.656626  | C                                                                      | 0.718669  | -2.826454 | 2.883356  |
| C                                                                                    | -1.339584 | 0.149672  | 1.159808  | C                                                                      | -0.043527 | -3.231260 | 1.620797  |
| C                                                                                    | -0.357893 | 3.097845  | -0.330296 |                                                                        |           |           |           |
| C                                                                                    | 2.017902  | 0.856794  | 0.925772  |                                                                        |           |           |           |
| C                                                                                    | 1.844115  | 0.253215  | 5.385691  |                                                                        |           |           |           |



|   |           |           |           |   |           |           |          |
|---|-----------|-----------|-----------|---|-----------|-----------|----------|
| H | 2.393959  | -2.504815 | -1.268076 | C | -0.637110 | 1.627870  | 3.001473 |
| H | -1.412761 | -3.172715 | -1.167337 | C | -0.909108 | 1.595894  | 4.368433 |
| H | -0.064851 | -2.769331 | -2.210665 | H | 0.497683  | 4.937345  | 4.780368 |
| H | 0.049319  | 3.223543  | 0.874785  | H | 0.130627  | -2.084923 | 2.099129 |
| H | -1.552879 | 2.662260  | 1.311813  | H | -0.606810 | -1.866222 | 3.694580 |
| H | 0.534949  | 3.730434  | 3.340948  | H | 0.172707  | -3.400191 | 3.281103 |
| H | -0.844481 | 4.652553  | 2.720758  | H | 3.291070  | -2.977314 | 1.345018 |
| H | -1.119569 | 3.230454  | 3.738748  | H | 3.715523  | -1.286051 | 1.036411 |
| H | 2.367379  | 3.051743  | 1.312098  | H | 2.027988  | -1.810285 | 0.925263 |
| H | 3.737898  | 1.996351  | 1.703958  | H | 5.683398  | -0.172755 | 4.154175 |
| H | 2.585904  | 1.533560  | 0.427911  | H | 5.329587  | -0.557583 | 2.462644 |
| H | -0.033563 | 1.602516  | 4.941686  | H | 5.823602  | -1.840844 | 3.578643 |
| H | -0.917125 | 0.157440  | 5.465563  | H | 4.318244  | -1.539272 | 6.943412 |
| H | 0.705413  | 0.003571  | 4.774317  | H | 3.263471  | -0.128507 | 7.112933 |
| H | 4.209083  | -1.785839 | 0.219006  | H | 4.778405  | 0.000540  | 6.204473 |
| H | 2.872371  | -0.626596 | 0.431124  | H | -0.174677 | -1.373218 | 5.879164 |
| H | 3.164493  | -1.867239 | 1.649123  | H | 0.900985  | -2.527893 | 6.676611 |
| H | 0.367882  | -3.267081 | 3.733120  | H | 1.081696  | -0.797108 | 6.989538 |
| H | 1.849436  | -3.187211 | 2.767464  | H | 3.710659  | 1.836983  | 0.014264 |
| H | 0.834439  | -1.745660 | 2.947352  | H | 4.821988  | 2.721263  | 1.077407 |
| H | -0.430305 | -5.247644 | -2.218545 | H | 3.535351  | 3.595767  | 0.216507 |
| H | 1.149612  | -4.892927 | -1.501642 | H | -0.354007 | 0.718739  | 2.473943 |
| H | -0.222301 | -5.322588 | -0.463971 | H | -1.549535 | 2.347514  | 4.828748 |
| H | 3.855017  | 0.777577  | -3.563739 | H | -0.800299 | 0.668510  | 4.929500 |
| H | 2.339209  | 1.235206  | -4.359774 | H | -1.047220 | 2.416325  | 2.368498 |
| H | 2.934426  | 2.168476  | -2.974400 | H | -0.814710 | 4.340807  | 3.641902 |
| H | 0.723231  | -0.498960 | -4.821763 | H | 0.853625  | 4.152610  | 1.817949 |
| H | -0.918775 | -0.250847 | -5.430554 | H | 2.164548  | 4.749679  | 2.953948 |
| H | 0.106574  | 1.145432  | -5.058463 | H | 0.381962  | 3.217311  | 6.509795 |
| H | -0.779646 | 2.933765  | -3.773267 | H | 1.058076  | 1.504734  | 6.538700 |
| H | 0.044499  | 4.331374  | -3.068922 | H | 2.518143  | 4.035884  | 5.472533 |
| H | 0.980287  | 3.087441  | -3.914544 | H | 3.200517  | 2.332835  | 5.560564 |

[Ni(ZnCp\*)(ZnMe)(C<sub>2</sub>H<sub>2</sub>)<sub>3</sub>]:

|    |          |           |          |
|----|----------|-----------|----------|
| Zn | 2.150449 | 0.418056  | 3.757951 |
| Zn | 2.576911 | 2.329696  | 2.275060 |
| Ni | 0.953972 | 2.469248  | 4.064569 |
| C  | 1.554936 | -1.789859 | 3.696987 |
| C  | 2.766910 | -1.625072 | 2.947530 |
| C  | 3.788446 | -1.165711 | 3.849415 |
| C  | 3.206260 | -1.047020 | 5.155319 |
| C  | 1.825650 | -1.431778 | 5.061056 |
| C  | 0.251008 | -2.306625 | 3.168103 |
| C  | 2.958774 | -1.937060 | 1.494191 |
| C  | 5.223646 | -0.920161 | 3.493815 |
| C  | 3.924026 | -0.657555 | 6.412388 |
| C  | 0.862638 | -1.532999 | 6.203704 |
| C  | 3.776889 | 2.660107  | 0.740115 |
| C  | 2.316464 | 2.967933  | 5.568954 |
| C  | 1.126292 | 2.514827  | 6.136342 |
| C  | 0.250150 | 4.377086  | 3.877316 |
| C  | 1.205180 | 4.234832  | 2.850232 |

[Ni(ZnCp\*)(ZnMe)(C<sub>2</sub>H<sub>2</sub>)<sub>3</sub>]:

|    |           |           |          |
|----|-----------|-----------|----------|
| Zn | 3.003134  | 2.461726  | 2.534514 |
| Zn | 2.537335  | 0.856484  | 4.329399 |
| Ni | 1.040563  | 2.698736  | 3.901358 |
| C  | 0.407016  | 2.700507  | 1.972041 |
| C  | -0.080956 | 1.714439  | 2.586916 |
| C  | 2.229981  | 4.370102  | 4.397725 |
| C  | 1.091109  | 4.749711  | 4.052335 |
| C  | -0.447054 | 2.548645  | 5.316253 |
| C  | 0.559774  | 2.040336  | 5.854728 |
| C  | 4.071098  | 2.933217  | 0.950157 |
| C  | 1.970812  | -1.113362 | 6.914155 |
| C  | 4.996654  | -0.683970 | 5.943005 |
| C  | 5.042331  | -0.930863 | 2.756693 |
| C  | 2.067776  | -1.490153 | 1.762877 |
| C  | 0.163847  | -1.576861 | 4.342370 |
| C  | 2.438865  | -1.036142 | 5.492357 |
| C  | 3.801315  | -0.848233 | 5.053036 |
| C  | 3.824170  | -1.008231 | 3.625854 |

|   |           |           |          |
|---|-----------|-----------|----------|
| C | 2.491815  | -1.289166 | 3.186430 |
| C | 1.637882  | -1.308396 | 4.330202 |
| H | 0.287458  | 5.433774  | 3.840150 |
| H | 3.217349  | 4.504843  | 4.804886 |
| H | 1.083573  | 1.617307  | 6.694942 |
| H | -1.465926 | 2.883334  | 5.222576 |
| H | -0.697021 | 0.835343  | 2.694548 |
| H | 0.463133  | 3.367632  | 1.124554 |
| H | 3.881969  | 3.971877  | 0.645659 |
| H | 5.144310  | 2.820807  | 1.154593 |
| H | 3.810929  | 2.274360  | 0.109936 |
| H | 2.557030  | -0.461219 | 7.576986 |
| H | 2.062063  | -2.137648 | 7.311729 |
| H | 0.914460  | -0.826575 | 7.008415 |
| H | 5.790059  | -0.100978 | 5.456138 |
| H | 4.739521  | -0.173215 | 6.880722 |
| H | 5.431996  | -1.659960 | 6.214271 |
| H | 5.517466  | -1.918220 | 2.635835 |
| H | 4.801241  | -0.562989 | 1.750108 |
| H | 5.799443  | -0.256850 | 3.179423 |
| H | 1.036597  | -1.151735 | 1.594376 |
| H | 2.710089  | -0.930961 | 1.068973 |
| H | 2.115959  | -2.550042 | 1.465023 |
| H | -0.063327 | -2.594768 | 4.697944 |
| H | -0.373743 | -0.874424 | 4.995822 |
| H | -0.264975 | -1.489622 | 3.335013 |

[Ni(ZnCp\*)<sub>2</sub>(ZnMe)<sub>2</sub>(C<sub>2</sub>H<sub>4</sub>)<sub>2</sub>]:

|    |           |           |           |
|----|-----------|-----------|-----------|
| Zn | -1.231231 | 1.437554  | 1.978916  |
| Zn | 1.545471  | 1.048979  | 1.986280  |
| Zn | 0.110007  | 0.808851  | 4.170247  |
| Zn | -0.011729 | 0.150919  | 0.044009  |
| Ni | -0.101005 | -0.597736 | 2.283191  |
| C  | -1.964760 | -1.241739 | 2.996182  |
| C  | -1.658518 | -1.878883 | 1.785544  |
| C  | 1.075926  | -2.026847 | 3.224513  |
| C  | 1.490530  | -1.905917 | 1.890804  |
| C  | -0.565954 | 4.044646  | 4.971850  |
| C  | -2.644797 | 1.783110  | 5.849581  |
| C  | -0.979394 | -0.732276 | 6.909645  |
| C  | 2.130121  | -0.016503 | 6.693865  |
| C  | -0.404654 | 0.533014  | 6.350510  |
| C  | 2.381340  | 2.934986  | 5.492308  |
| C  | -0.218736 | 2.680970  | 5.485238  |
| C  | 1.106260  | 2.179992  | 5.710225  |
| C  | 0.553108  | -2.370667 | -2.049210 |
| C  | 2.835505  | -0.154142 | -1.736862 |
| C  | 1.425991  | 2.712976  | -1.674598 |
| C  | -1.722266 | 2.273453  | -1.957686 |
| C  | 0.728561  | 1.390363  | -1.764547 |
| C  | -2.266611 | -0.868586 | -2.190086 |
| C  | 0.335912  | -0.893761 | -1.924371 |

|   |           |           |           |
|---|-----------|-----------|-----------|
| C | -0.687201 | 1.193604  | -1.881468 |
| C | -2.524745 | 2.912235  | 1.819089  |
| C | 3.191078  | 2.101375  | 1.745285  |
| C | -1.151891 | 1.665513  | 5.880358  |
| C | 0.993812  | 0.850666  | 6.245001  |
| C | 1.360969  | 0.103137  | -1.791313 |
| C | -0.932942 | -0.219094 | -1.979716 |
| H | 0.380566  | -2.813043 | 3.521447  |
| H | 1.703061  | -1.641423 | 4.026869  |
| H | 2.452634  | -1.443667 | 1.659812  |
| H | 1.129504  | -2.593216 | 1.126697  |
| H | -1.212883 | -2.874486 | 1.778302  |
| H | -2.195575 | -1.609980 | 0.877359  |
| H | -1.766459 | -1.726957 | 3.951082  |
| H | -2.756730 | -0.490558 | 3.030544  |
| H | -1.514967 | 4.041228  | 4.420173  |
| H | -0.667147 | 4.772774  | 5.792905  |
| H | 0.206870  | 4.429471  | 4.292737  |
| H | -3.187740 | 2.956963  | 2.693699  |
| H | -1.986819 | 3.868055  | 1.747177  |
| H | -3.143548 | 2.799043  | 0.919177  |
| H | 3.804020  | 1.703337  | 0.925381  |
| H | 2.930860  | 3.142040  | 1.505567  |
| H | 3.795442  | 2.102545  | 2.662015  |
| H | -3.039726 | 2.191759  | 6.793729  |
| H | -2.980179 | 2.448624  | 5.043168  |
| H | -3.125913 | 0.808065  | 5.693674  |
| H | -1.963769 | -0.955245 | 6.476367  |
| H | -0.328961 | -1.595677 | 6.714002  |
| H | -1.114624 | -0.669730 | 8.001655  |
| H | 2.395411  | 0.176628  | 7.746078  |
| H | 1.882149  | -1.083846 | 6.616686  |
| H | 3.035329  | 0.157754  | 6.096469  |
| H | 3.219405  | 2.260604  | 5.271898  |
| H | 2.299663  | 3.638288  | 4.653065  |
| H | 2.661138  | 3.520915  | 6.382894  |
| H | 0.661095  | -2.677995 | -3.102113 |
| H | 1.464127  | -2.691216 | -1.526000 |
| H | -0.286679 | -2.942063 | -1.630848 |
| H | 3.359098  | 0.621968  | -1.163222 |
| H | 3.062164  | -1.120688 | -1.266811 |
| H | 3.282278  | -0.171208 | -2.744084 |
| H | 0.801615  | 3.465523  | -1.174146 |
| H | 2.365305  | 2.639104  | -1.111321 |
| H | 1.673220  | 3.109411  | -2.672714 |
| H | -1.878289 | 2.610950  | -2.995224 |
| H | -2.694324 | 1.930813  | -1.578928 |
| H | -1.435268 | 3.154694  | -1.368902 |
| H | -2.513666 | -0.947737 | -3.261313 |
| H | -2.291925 | -1.886936 | -1.779085 |
| H | -3.076286 | -0.298724 | -1.714362 |

[Ni(ZnCp\*)<sub>2</sub>(ZnMe)<sub>2</sub>(C<sub>2</sub>H<sub>2</sub>)<sub>2</sub>]:

|    |           |           |           |
|----|-----------|-----------|-----------|
| Zn | -2.452463 | -0.423006 | 2.216151  |
| Zn | 2.210515  | -1.023264 | 2.387703  |
| Zn | 0.242755  | 0.683110  | 3.415114  |
| Zn | -0.169719 | 0.278407  | 0.752911  |
| Ni | -0.200384 | -1.336966 | 2.396732  |
| C  | -0.734191 | -1.512276 | 4.202947  |
| C  | -1.962000 | -1.714211 | 3.702827  |
| C  | 1.344178  | -2.546793 | 1.359131  |
| C  | 0.194064  | -2.206286 | 0.760236  |
| C  | -1.776582 | 3.364639  | 3.280625  |
| C  | -2.703909 | 1.196035  | 5.381611  |
| C  | -0.084397 | 0.192125  | 7.005323  |
| C  | 2.438800  | 1.668324  | 5.801806  |
| C  | -0.119775 | 1.148606  | 5.850532  |
| C  | 1.415199  | 3.717282  | 3.544260  |
| C  | -0.862212 | 2.545627  | 4.144170  |
| C  | 0.584012  | 2.667748  | 4.222730  |
| C  | -0.121574 | -1.319987 | -2.461712 |
| C  | 2.733459  | -0.589940 | -1.113775 |
| C  | 2.491404  | 2.276645  | 0.192268  |
| C  | -0.502465 | 3.356414  | -0.302412 |
| C  | 1.362897  | 1.508496  | -0.430599 |
| C  | -2.114867 | 1.069599  | -1.885881 |
| C  | 0.210005  | -0.100152 | -1.654429 |
| C  | -0.000102 | 1.975301  | -0.605071 |
| C  | -3.731386 | 0.779553  | 1.328836  |
| C  | 3.804819  | 0.006451  | 2.905501  |
| C  | -1.283278 | 1.614179  | 5.151146  |
| C  | 1.035795  | 1.781180  | 5.280136  |
| C  | 1.483073  | 0.235887  | -1.082714 |
| C  | -0.714236 | 0.959055  | -1.357148 |
| H  | -2.680133 | -2.464929 | 4.089434  |
| H  | -0.259755 | -1.811164 | 5.151558  |
| H  | 1.831925  | -3.537548 | 1.263998  |
| H  | -0.375372 | -2.659563 | -0.067277 |
| H  | -2.697430 | 2.808890  | 3.018322  |
| H  | -2.093083 | 4.298186  | 3.797316  |
| H  | -1.293726 | 3.664652  | 2.332068  |
| H  | -4.566937 | 1.039488  | 2.012089  |
| H  | -3.251497 | 1.721090  | 0.996076  |
| H  | -4.164680 | 0.286167  | 0.434110  |
| H  | 4.642069  | -0.185854 | 2.202267  |
| H  | 3.608813  | 1.096717  | 2.920092  |
| H  | 4.138360  | -0.291378 | 3.921284  |
| H  | -3.338454 | 2.045773  | 5.713362  |
| H  | -3.166935 | 0.788047  | 4.455062  |
| H  | -2.777602 | 0.398607  | 6.144989  |
| H  | -1.019162 | -0.396428 | 7.084345  |
| H  | 0.757966  | -0.526363 | 6.921462  |
| H  | 0.051094  | 0.724928  | 7.972586  |

|   |           |           |           |
|---|-----------|-----------|-----------|
| H | 2.590449  | 2.312931  | 6.696216  |
| H | 2.683853  | 0.630795  | 6.106934  |
| H | 3.187960  | 1.972038  | 5.046377  |
| H | 2.452966  | 3.375978  | 3.360751  |
| H | 0.981938  | 4.016697  | 2.569667  |
| H | 1.478143  | 4.637687  | 4.166325  |
| H | -0.145648 | -1.094601 | -3.550918 |
| H | 0.619543  | -2.129014 | -2.311372 |
| H | -1.120686 | -1.728644 | -2.202224 |
| H | 3.117292  | -0.794046 | -0.088989 |
| H | 2.561691  | -1.575953 | -1.585259 |
| H | 3.551046  | -0.083474 | -1.670372 |
| H | 2.139848  | 2.956771  | 0.990383  |
| H | 3.243433  | 1.601951  | 0.644653  |
| H | 3.021787  | 2.901188  | -0.560811 |
| H | -0.354318 | 4.033465  | -1.172865 |
| H | -1.583878 | 3.365901  | -0.062466 |
| H | 0.036472  | 3.809566  | 0.552770  |
| H | -2.121698 | 1.437649  | -2.936097 |
| H | -2.635787 | 0.090852  | -1.883535 |
| H | -2.730080 | 1.768653  | -1.288330 |

[Ni(ZnCp\*)<sub>3</sub>(ZnMe)<sub>3</sub>(C<sub>2</sub>H<sub>4</sub>)<sub>3</sub>]:

|    |           |           |           |
|----|-----------|-----------|-----------|
| Zn | -1.480808 | -2.524569 | 1.358427  |
| Zn | -1.520155 | -1.591592 | 4.105942  |
| Zn | -1.724233 | 0.044549  | 1.912448  |
| Zn | 2.006216  | 0.124624  | 2.049990  |
| Zn | 0.026736  | 0.808878  | 3.699429  |
| Zn | 0.310044  | -0.878786 | 0.228779  |
| Ni | 0.150889  | -1.253403 | 2.523993  |
| C  | -0.380569 | -5.627924 | 0.736655  |
| C  | -2.193634 | -5.267283 | 3.340165  |
| C  | -2.400687 | -4.579549 | 2.026455  |
| C  | -1.726796 | -3.988309 | -1.633149 |
| C  | -4.597050 | -3.274902 | 2.598607  |
| C  | -3.479022 | -3.695310 | 1.695367  |
| C  | -4.307853 | -2.473051 | -0.451793 |
| C  | -3.340469 | -3.318226 | 0.318978  |
| C  | -2.174390 | -3.977650 | -0.205087 |
| C  | -1.586289 | -4.746485 | 0.859243  |
| C  | -2.777326 | -2.036805 | 5.557161  |
| C  | 0.001799  | 0.308338  | 7.081664  |
| C  | -1.624795 | 3.770989  | 3.608192  |
| C  | 1.575068  | 3.799141  | 3.625481  |
| C  | 2.239973  | 2.652591  | -0.044045 |
| C  | 0.859258  | -1.450560 | -2.824176 |
| C  | -0.854327 | 2.694606  | -0.260489 |
| C  | -2.606559 | 1.633821  | 5.730117  |
| C  | 2.566167  | 1.622113  | 5.740233  |
| C  | 3.338929  | -0.037219 | -1.464338 |
| C  | -1.790393 | 0.156997  | -2.020760 |





|   |           |           |           |
|---|-----------|-----------|-----------|
| C | -0.703986 | 0.930475  | -1.785505 |
| H | 1.069239  | -0.260944 | -2.120565 |
| H | 1.352498  | 1.334229  | -1.242350 |
| H | -1.323829 | 0.352742  | -2.471599 |
| H | -1.052674 | 1.944021  | -1.590239 |
| C | -5.045969 | -0.730914 | 2.494672  |
| H | -4.582759 | -1.691747 | 2.754945  |
| H | -6.129980 | -0.834354 | 2.658938  |
| H | -4.677301 | 0.018473  | 3.207151  |
| C | -4.601918 | -2.738559 | 0.052657  |
| H | -3.994868 | -3.200862 | -0.736495 |
| H | -5.632816 | -3.105073 | -0.072440 |
| H | -4.237317 | -3.115068 | 1.017603  |

[Ni(AlCp\*)(C<sub>2</sub>H<sub>2</sub>)<sub>3</sub>]:

|    |           |           |           |
|----|-----------|-----------|-----------|
| C  | -4.209822 | -0.417060 | 0.852416  |
| C  | -4.174727 | 0.915054  | 0.297595  |
| C  | -4.366028 | 0.810962  | -1.112765 |
| C  | -4.486791 | -0.583578 | -1.443505 |
| C  | -4.421698 | -1.335927 | -0.218694 |
| Al | -2.474486 | -0.266380 | -0.549256 |
| Ni | -0.458633 | 0.271108  | 0.798489  |
| C  | -4.382252 | 1.945960  | -2.088176 |
| C  | -4.740015 | -1.145271 | -2.810709 |
| C  | -3.979659 | 2.177099  | 1.079640  |
| H  | -3.322862 | 2.012214  | 1.943515  |
| H  | -3.522027 | 2.963413  | 0.465806  |
| H  | -4.938583 | 2.565322  | 1.456458  |
| H  | -3.807970 | 2.803464  | -1.714998 |
| H  | -3.950154 | 1.655666  | -3.054980 |
| H  | -5.409089 | 2.295245  | -2.278343 |
| H  | -4.333608 | -2.159767 | -2.914684 |
| H  | -5.819228 | -1.202614 | -3.022172 |
| H  | -4.287327 | -0.524116 | -3.594626 |
| C  | -1.086480 | -1.605607 | -0.094164 |
| C  | 0.126579  | -1.160028 | -0.610215 |
| C  | -0.529909 | 0.375343  | 2.660093  |
| C  | -0.502875 | 1.556585  | 2.150976  |
| C  | 0.158880  | 0.191854  | -1.198593 |
| C  | -1.025957 | 0.921624  | -1.194675 |
| C  | -4.052462 | -0.758708 | 2.301890  |
| H  | -3.642649 | -1.768168 | 2.434431  |
| H  | -5.018509 | -0.720544 | 2.828735  |
| H  | -3.370552 | -0.059527 | 2.803035  |
| C  | -4.507451 | -2.825429 | -0.099721 |
| H  | -4.100595 | -3.327059 | -0.987610 |
| H  | -5.550767 | -3.157817 | 0.016827  |

|   |           |           |           |
|---|-----------|-----------|-----------|
| H | -3.947511 | -3.190985 | 0.770540  |
| H | -0.540105 | 2.628734  | 2.305798  |
| H | -0.605862 | -0.246795 | 3.544414  |
| H | -0.981947 | 1.962497  | -1.519503 |
| H | 1.119364  | 0.592656  | -1.536240 |
| H | -1.090224 | -2.553004 | 0.447400  |
| H | 1.064160  | -1.718330 | -0.530303 |

[Ni(AlCp\*)(C<sub>2</sub>H<sub>4</sub>)<sub>2</sub>]:

|    |           |           |           |
|----|-----------|-----------|-----------|
| Al | -2.135926 | -0.255143 | 0.186728  |
| Ni | -0.096332 | 0.466066  | -0.256512 |
| C  | 1.206908  | 1.282771  | 1.122370  |
| C  | 0.126583  | 2.156259  | 0.879550  |
| C  | 0.664956  | 0.951593  | -2.095821 |
| C  | -0.735574 | 1.116702  | -2.110088 |
| H  | 1.122921  | 0.122527  | -2.632813 |
| H  | 1.318943  | 1.810875  | -1.932665 |
| H  | -1.350786 | 0.418541  | -2.678330 |
| H  | -1.171011 | 2.109287  | -1.988642 |
| C  | -4.235754 | 0.387581  | -0.453123 |
| C  | -4.239710 | 0.198209  | 0.966156  |
| C  | -4.517120 | 1.255206  | 1.991534  |
| H  | -4.012730 | 1.038799  | 2.942412  |
| H  | -5.595368 | 1.332762  | 2.202399  |
| H  | -4.178140 | 2.243467  | 1.653752  |
| C  | -3.947304 | -1.179645 | 1.232228  |
| C  | -3.756302 | -1.838853 | -0.025255 |
| C  | -3.933802 | -0.869829 | -1.066068 |
| C  | -3.838896 | -1.151784 | -2.534862 |
| H  | -3.012677 | -1.839129 | -2.763714 |
| H  | -4.764238 | -1.615878 | -2.910609 |
| H  | -3.674972 | -0.233695 | -3.112291 |
| C  | -4.481140 | 1.684995  | -1.160949 |
| H  | -4.066731 | 2.533715  | -0.600499 |
| H  | -5.558509 | 1.871171  | -1.291900 |
| H  | -4.020563 | 1.693659  | -2.156543 |
| Al | 0.707706  | -1.542946 | 0.181865  |
| C  | 1.057469  | -3.803047 | 0.182465  |
| C  | 0.764731  | -3.384623 | 1.520805  |
| C  | -0.389318 | -3.825938 | 2.366873  |
| H  | -0.811819 | -2.990797 | 2.943019  |
| H  | -0.082664 | -4.599559 | 3.088152  |
| H  | -1.195356 | -4.250693 | 1.755766  |
| C  | 1.799465  | -2.487200 | 1.941926  |
| C  | 2.733238  | -2.351933 | 0.866003  |
| C  | 2.273244  | -3.160409 | -0.222859 |
| C  | 2.955281  | -3.318076 | -1.547878 |
| H  | 3.486988  | -2.402609 | -1.839175 |
| H  | 3.695866  | -4.132867 | -1.520585 |
| H  | 2.239169  | -3.553780 | -2.346011 |



|   |           |           |           |
|---|-----------|-----------|-----------|
| C | 0.259763  | -4.768593 | -0.640069 |
| H | -0.793071 | -4.788465 | -0.331467 |
| H | 0.651019  | -5.793326 | -0.541619 |
| H | 0.286271  | -4.510820 | -1.707501 |
| C | -3.890947 | -1.818799 | 2.586260  |
| H | -3.488338 | -1.132078 | 3.343099  |
| H | -3.258316 | -2.715301 | 2.583516  |
| H | -4.893637 | -2.125111 | 2.923403  |
| C | -3.464828 | -3.291833 | -0.239576 |
| H | -3.036149 | -3.751485 | 0.659715  |
| H | -2.753856 | -3.444472 | -1.063394 |
| H | -4.380428 | -3.850757 | -0.488805 |
| C | 1.881433  | -1.835494 | 3.288914  |
| H | 0.895289  | -1.498315 | 3.637287  |
| H | 2.544181  | -0.961610 | 3.274919  |
| H | 2.274041  | -2.534043 | 4.044395  |
| C | 3.964405  | -1.498228 | 0.859973  |
| H | 3.885341  | -0.672207 | 1.577642  |
| H | 4.142694  | -1.056705 | -0.129627 |
| H | 4.858209  | -2.084045 | 1.125360  |
| H | -0.640996 | 2.300045  | 1.638203  |
| H | 0.234195  | 2.981301  | 0.172178  |
| H | 1.274726  | 0.769351  | 2.081794  |
| H | 2.164819  | 1.446165  | 0.627140  |

[Ni(AlCp\*)<sub>2</sub>(C<sub>2</sub>H<sub>2</sub>)<sub>2</sub>]:

|    |           |           |           |
|----|-----------|-----------|-----------|
| Ni | 0.019404  | 0.841300  | 0.106412  |
| Al | 0.332515  | -1.770185 | -0.038551 |
| Al | -1.913055 | -0.651131 | -0.105387 |
| C  | 3.408126  | -0.994069 | 0.779626  |
| C  | 1.324663  | -1.611481 | 3.134365  |
| C  | -3.880647 | -3.335779 | -0.297483 |
| C  | -3.689782 | -1.842041 | 2.521522  |
| C  | 0.565635  | -5.075008 | -0.619812 |
| C  | 2.933939  | -3.115014 | -1.538732 |
| C  | 2.170215  | -3.042372 | -0.252376 |
| C  | 2.379433  | -2.082509 | 0.787615  |
| C  | 1.454815  | -2.375699 | 1.853070  |
| C  | -0.425404 | -4.132053 | 2.251999  |
| C  | 0.691298  | -3.518141 | 1.469861  |
| C  | 1.110867  | -3.918153 | 0.161406  |
| C  | -3.825159 | 1.768675  | -1.158219 |
| C  | -4.001863 | -1.115926 | -2.586648 |
| C  | -3.874193 | -0.851191 | -1.116263 |
| C  | -3.857015 | -1.855689 | -0.076753 |
| C  | -3.786621 | -1.191043 | 1.177707  |
| C  | -3.692936 | 1.303285  | 1.966955  |
| C  | -3.743975 | 0.223662  | 0.929639  |
| C  | -3.841360 | 0.433364  | -0.481767 |
| C  | -0.673693 | 0.340793  | -1.611425 |
| C  | 0.405626  | -0.504870 | -1.637787 |

|   |           |           |           |
|---|-----------|-----------|-----------|
| C | -0.056548 | 1.768623  | 1.748850  |
| C | 1.137890  | 1.782045  | 1.304468  |
| H | -0.949650 | 1.025784  | -2.422720 |
| H | 2.179548  | 2.066648  | 1.375416  |
| H | -0.781756 | 2.012228  | 2.514127  |
| H | 1.148545  | -0.457159 | -2.447356 |
| H | 4.412000  | -1.393197 | 0.993291  |
| H | 3.454559  | -0.484801 | -0.193194 |
| H | 3.183480  | -0.234217 | 1.537057  |
| H | 2.023333  | -1.986036 | 3.898672  |
| H | 1.525902  | -0.542704 | 2.986117  |
| H | 0.310365  | -1.694901 | 3.546576  |
| H | -4.911642 | -3.718566 | -0.354863 |
| H | -3.373955 | -3.611519 | -1.232203 |
| H | -3.375745 | -3.868598 | 0.519073  |
| H | -4.676251 | -1.924649 | 3.003875  |
| H | -3.275381 | -2.855656 | 2.446727  |
| H | -3.041876 | -1.270398 | 3.200812  |
| H | 0.699158  | -4.932203 | -1.700183 |
| H | 1.071304  | -6.015260 | -0.348913 |
| H | -0.507880 | -5.216624 | -0.434433 |
| H | 2.321743  | -3.523032 | -2.353890 |
| H | 3.821416  | -3.760080 | -1.440722 |
| H | 3.284174  | -2.122985 | -1.852457 |
| H | -1.208466 | -4.526862 | 1.589066  |
| H | -0.075191 | -4.967478 | 2.878328  |
| H | -0.897802 | -3.397570 | 2.917743  |
| H | -3.678485 | 1.667760  | -2.240149 |
| H | -4.771447 | 2.308055  | -1.000145 |
| H | -3.012632 | 2.402941  | -0.773700 |
| H | -3.549771 | -0.312766 | -3.182062 |
| H | -5.058393 | -1.197817 | -2.886054 |
| H | -3.506826 | -2.053259 | -2.872433 |
| H | -3.185439 | 2.198942  | 1.586115  |
| H | -4.705921 | 1.603769  | 2.277943  |
| H | -3.160764 | 0.972397  | 2.868701  |

[Ni(AlCp\*)<sub>3</sub>(C<sub>2</sub>H<sub>4</sub>)]:

|    |           |           |           |
|----|-----------|-----------|-----------|
| Ni | 0.047786  | 0.476237  | -0.430965 |
| C  | 0.595970  | 0.162472  | -2.358652 |
| C  | -0.515160 | 1.032333  | -2.300725 |
| H  | 0.460744  | -0.864996 | -2.697638 |
| H  | 1.601074  | 0.561114  | -2.494177 |
| H  | -1.500678 | 0.668447  | -2.594631 |
| H  | -0.378161 | 2.109552  | -2.397568 |
| Al | 0.378233  | -1.556093 | 0.381013  |
| C  | 0.876810  | -3.621358 | -0.514288 |
| C  | 0.212227  | -3.820406 | 0.738076  |
| C  | -1.067347 | -4.572516 | 0.935111  |
| H  | -1.566149 | -4.287863 | 1.869991  |
| H  | -0.885180 | -5.658020 | 0.979452  |

|    |           |           |           |                                                            |           |           |           |
|----|-----------|-----------|-----------|------------------------------------------------------------|-----------|-----------|-----------|
| H  | -1.774799 | -4.397734 | 0.112408  | H                                                          | -2.988897 | -1.818662 | 2.775614  |
| C  | 1.027336  | -3.246149 | 1.770096  | H                                                          | -2.988756 | -2.489721 | 1.137097  |
| C  | 2.198932  | -2.705109 | 1.148945  | H                                                          | -4.516490 | -2.309739 | 2.020047  |
| C  | 2.101745  | -2.930985 | -0.259109 | C                                                          | -3.890040 | -0.159584 | -0.129710 |
| C  | 3.105006  | -2.459180 | -1.265961 | C                                                          | -3.902667 | -1.171370 | -1.234494 |
| H  | 3.365597  | -1.403840 | -1.099672 | H                                                          | -3.044735 | -1.856271 | -1.153112 |
| H  | 4.034716  | -3.046416 | -1.209392 | H                                                          | -4.819546 | -1.779567 | -1.213288 |
| H  | 2.720676  | -2.544598 | -2.289343 | H                                                          | -3.845174 | -0.692368 | -2.219296 |
| C  | 0.362002  | -4.064208 | -1.849906 | C                                                          | -4.181292 | 2.034866  | -1.528819 |
| H  | -0.729833 | -3.961069 | -1.916745 | H                                                          | -3.583856 | 2.956528  | -1.534842 |
| H  | 0.603122  | -5.121435 | -2.042479 | H                                                          | -5.235159 | 2.324717  | -1.662647 |
| H  | 0.798200  | -3.473991 | -2.665627 | H                                                          | -3.885773 | 1.449345  | -2.407902 |
| C  | 0.726098  | -3.261986 | 3.238490  | C                                                          | 4.443476  | 1.760484  | 2.320916  |
| H  | -0.354214 | -3.207309 | 3.429405  | H                                                          | 5.140670  | 2.366291  | 2.921061  |
| H  | 1.193943  | -2.413968 | 3.755337  | H                                                          | 4.841267  | 1.726700  | 1.296918  |
| H  | 1.096256  | -4.183474 | 3.714825  | H                                                          | 4.472529  | 0.738600  | 2.718718  |
| C  | 3.332944  | -1.991651 | 1.815972  | C                                                          | 1.984210  | 0.741917  | 4.149807  |
| H  | 3.156930  | -1.877385 | 2.892023  | H                                                          | 2.851424  | 0.090313  | 3.990722  |
| H  | 3.477544  | -0.985862 | 1.391031  | H                                                          | 1.081927  | 0.119655  | 4.056189  |
| H  | 4.277761  | -2.541633 | 1.690434  | H                                                          | 2.027987  | 1.100725  | 5.189836  |
| Al | 1.322456  | 1.636357  | 0.983847  |                                                            |           |           |           |
| C  | 1.247203  | 3.721163  | 1.968654  | [Ni(AlCp*) <sub>3</sub> (C <sub>2</sub> H <sub>2</sub> )]: |           |           |           |
| C  | 2.607639  | 3.464602  | 1.609947  | Ni                                                         | 0.252040  | 0.171399  | -0.526441 |
| C  | 3.434380  | 4.250095  | 0.637932  | Al                                                         | -1.743980 | 0.931298  | 0.143267  |
| H  | 4.167157  | 3.613062  | 0.124633  | Al                                                         | 1.334336  | 1.641106  | 0.739440  |
| H  | 3.995289  | 5.051175  | 1.145100  | Al                                                         | 0.436069  | -1.447305 | 1.064932  |
| H  | 2.812056  | 4.722827  | -0.133100 | C                                                          | 2.672203  | 0.760911  | 3.664343  |
| C  | 3.058498  | 2.330813  | 2.360923  | C                                                          | 4.506573  | 2.351621  | 1.542632  |
| C  | 1.971793  | 1.883106  | 3.178759  | C                                                          | -3.976237 | 3.306092  | -0.699932 |
| C  | 0.855657  | 2.743943  | 2.934703  | C                                                          | -3.908333 | 0.594877  | -2.364735 |
| C  | -0.491373 | 2.637465  | 3.574254  | C                                                          | -3.777230 | 0.707837  | -0.876064 |
| H  | -0.705558 | 1.608372  | 3.889958  | C                                                          | -3.478681 | -1.825692 | -0.264177 |
| H  | -0.571804 | 3.281381  | 4.464723  | C                                                          | -3.613696 | -0.369051 | 0.051191  |
| H  | -1.284509 | 2.938240  | 2.875667  | C                                                          | -3.308115 | -0.613919 | 2.616306  |
| C  | 0.357287  | 4.790248  | 1.413210  | C                                                          | -3.516705 | 0.185716  | 1.366785  |
| H  | 0.741907  | 5.180127  | 0.462395  | C                                                          | -3.721122 | 2.590521  | 2.384268  |
| H  | 0.265034  | 5.640190  | 2.107355  | C                                                          | -3.634661 | 1.609953  | 1.255666  |
| H  | -0.655637 | 4.405520  | 1.224116  | C                                                          | -3.786642 | 1.932146  | -0.133456 |
| Al | -1.908242 | 0.749348  | 0.545104  | C                                                          | -0.230033 | 4.439680  | 1.538304  |
| C  | -3.988337 | 1.261817  | -0.259923 | C                                                          | -0.206369 | 2.014487  | 3.615301  |
| C  | -3.863272 | 1.836874  | 1.046028  | C                                                          | 0.953071  | 2.493940  | 2.797035  |
| C  | -3.948519 | 3.298646  | 1.363057  | C                                                          | 2.257833  | 1.907702  | 2.797822  |
| H  | -3.471861 | 3.534508  | 2.323228  | C                                                          | 3.064005  | 2.615781  | 1.850639  |
| H  | -4.995747 | 3.633555  | 1.427933  | C                                                          | 2.712385  | 4.650111  | 0.250103  |
| H  | -3.459374 | 3.909014  | 0.591385  | C                                                          | 2.253917  | 3.651874  | 1.270361  |
| C  | -3.686719 | 0.767674  | 1.985657  | C                                                          | 0.953100  | 3.581718  | 1.866891  |
| C  | -3.616602 | 0.891102  | 3.476848  | C                                                          | 3.543158  | -2.364055 | 2.018262  |
| H  | -3.299536 | 1.893015  | 3.789064  | C                                                          | 1.093159  | -2.985535 | 4.040976  |
| H  | -2.913921 | 0.169247  | 3.915377  | C                                                          | -0.397429 | -4.134634 | -0.772593 |
| H  | -4.602139 | 0.701980  | 3.930631  | C                                                          | 2.591235  | -3.071537 | -0.901513 |
| C  | -3.698672 | -0.463984 | 1.254416  | C                                                          | 1.755872  | -3.193575 | 0.334628  |
| C  | -3.540488 | -1.837397 | 1.826364  |                                                            |           |           |           |

|   |           |           |           |
|---|-----------|-----------|-----------|
| C | 2.179512  | -2.870488 | 1.660547  |
| C | 1.090524  | -3.133796 | 2.549654  |
| C | -1.316684 | -4.102082 | 2.319063  |
| C | -0.002671 | -3.637028 | 1.769495  |
| C | 0.411650  | -3.676056 | 0.402006  |
| C | -0.183217 | -0.616435 | -2.246409 |
| C | 1.044194  | -0.272560 | -2.244161 |
| H | -1.012198 | -1.052938 | -2.787421 |
| H | 1.989588  | -0.207480 | -2.764734 |
| H | 2.789897  | 1.079241  | 4.711966  |
| H | 1.921172  | -0.043060 | 3.645590  |
| H | 3.626459  | 0.331891  | 3.338369  |
| H | 4.768723  | 1.299171  | 1.713071  |
| H | 4.746124  | 2.585571  | 0.496887  |
| H | 5.168924  | 2.963019  | 2.175342  |
| H | -3.569183 | 3.382264  | -1.716890 |
| H | -5.043717 | 3.573331  | -0.752851 |
| H | -3.478691 | 4.068504  | -0.085609 |
| H | -3.334513 | 1.375314  | -2.882561 |
| H | -4.958471 | 0.692096  | -2.680898 |
| H | -3.542892 | -0.373471 | -2.727447 |
| H | -4.297828 | -2.410376 | 0.180974  |
| H | -3.486191 | -2.008335 | -1.345084 |
| H | -2.529687 | -2.222399 | 0.128536  |
| H | -4.193820 | -1.221464 | 2.857584  |
| H | -2.455192 | -1.302475 | 2.507310  |
| H | -3.101636 | 0.031041  | 3.479317  |
| H | -3.177497 | 3.520563  | 2.168644  |
| H | -4.769511 | 2.866722  | 2.578300  |
| H | -3.316805 | 2.174680  | 3.314944  |
| H | -1.071325 | 3.831794  | 1.163803  |
| H | -0.582323 | 4.992839  | 2.421291  |
| H | 0.011658  | 5.173273  | 0.760138  |
| H | -1.118210 | 2.565546  | 3.361640  |
| H | -0.021976 | 2.147252  | 4.692320  |
| H | -0.404458 | 0.943782  | 3.444546  |
| H | 1.884237  | 4.991746  | -0.383885 |
| H | 3.151739  | 5.538334  | 0.730563  |
| H | 3.477627  | 4.225068  | -0.412661 |
| H | 4.309947  | -3.133260 | 1.839004  |
| H | 3.818641  | -1.483504 | 1.417478  |
| H | 3.603656  | -2.079391 | 3.075187  |
| H | 1.274807  | -3.951467 | 4.538687  |
| H | 1.874672  | -2.292720 | 4.378394  |
| H | 0.131979  | -2.603867 | 4.413488  |
| H | -0.299378 | -3.439322 | -1.618077 |
| H | -0.070226 | -5.127558 | -1.118441 |
| H | -1.463339 | -4.209474 | -0.524549 |
| H | 1.966363  | -2.931602 | -1.791786 |
| H | 3.208028  | -3.971610 | -1.056165 |
| H | 3.268448  | -2.209137 | -0.841187 |
| H | -2.121101 | -4.025879 | 1.576116  |

|   |           |           |          |
|---|-----------|-----------|----------|
| H | -1.264722 | -5.155665 | 2.637468 |
| H | -1.620807 | -3.514262 | 3.196071 |

[Ni(GaCp\*)(C<sub>2</sub>H<sub>4</sub>)<sub>3</sub>]:

|    |           |           |           |
|----|-----------|-----------|-----------|
| C  | -4.821981 | -0.341036 | 1.126116  |
| C  | -4.743775 | 0.994297  | 0.606858  |
| C  | -4.418991 | 0.907733  | -0.787454 |
| C  | -4.292158 | -0.476311 | -1.126702 |
| C  | -4.536908 | -1.247900 | 0.054574  |
| Ga | -2.566480 | 0.057195  | 0.461998  |
| Ni | -0.254879 | -0.096177 | -0.013779 |
| C  | -4.290450 | 2.066110  | -1.729285 |
| C  | -3.991577 | -1.030201 | -2.485798 |
| C  | -5.036993 | 2.253017  | 1.365452  |
| H  | -4.787210 | 2.154223  | 2.430256  |
| H  | -4.471922 | 3.107438  | 0.969623  |
| H  | -6.105694 | 2.515075  | 1.305353  |
| H  | -3.897670 | 2.958887  | -1.224314 |
| H  | -3.617680 | 1.837738  | -2.565810 |
| H  | -5.266274 | 2.340780  | -2.160991 |
| H  | -3.370857 | -1.934780 | -2.430864 |
| H  | -4.915077 | -1.301740 | -3.021705 |
| H  | -3.458673 | -0.301844 | -3.110758 |
| C  | -0.559494 | -1.998462 | -0.806245 |
| C  | 0.463094  | -2.029245 | 0.140269  |
| H  | -0.340914 | -1.942939 | -1.873325 |
| H  | -1.541187 | -2.403756 | -0.561474 |
| H  | 1.508125  | -1.988366 | -0.169008 |
| H  | 0.285775  | -2.437063 | 1.134788  |
| C  | 0.939588  | 0.326626  | 1.622738  |
| C  | 0.327510  | 1.498815  | 1.185432  |
| H  | 1.969198  | 0.101931  | 1.342748  |
| H  | 0.567346  | -0.204032 | 2.498691  |
| H  | 0.867097  | 2.213642  | 0.563034  |
| H  | -0.528988 | 1.907864  | 1.719563  |
| C  | 0.663759  | 0.633509  | -1.712703 |
| C  | -0.670810 | 1.023317  | -1.793593 |
| H  | 1.029181  | -0.223909 | -2.279914 |
| H  | 1.434178  | 1.336800  | -1.394560 |
| H  | -1.368384 | 0.471617  | -2.422584 |
| H  | -0.971367 | 2.037408  | -1.533263 |
| C  | -5.198771 | -0.721991 | 2.525043  |
| H  | -4.730102 | -1.667603 | 2.828938  |
| H  | -6.288540 | -0.853441 | 2.622999  |
| H  | -4.898644 | 0.045517  | 3.250886  |
| C  | -4.555337 | -2.744086 | 0.139751  |
| H  | -3.896441 | -3.201887 | -0.610256 |
| H  | -5.567759 | -3.142524 | -0.035075 |
| H  | -4.233260 | -3.101014 | 1.127280  |

[Ni(GaCp\*)(C<sub>2</sub>H<sub>2</sub>)<sub>3</sub>]:

|    |           |           |           |
|----|-----------|-----------|-----------|
| Ga | -2.556717 | 0.203803  | 1.075613  |
| Ni | 0.214078  | -0.062112 | -0.518286 |
| C  | -4.441974 | -2.754230 | 0.444819  |
| C  | -5.759709 | -0.697689 | 2.509727  |
| C  | -0.366801 | 1.589808  | -1.466080 |
| C  | -0.306597 | 0.660023  | -2.303390 |
| C  | 1.064060  | 1.236775  | 0.734544  |
| C  | 1.023264  | 0.117493  | 1.294761  |
| C  | 0.194205  | -2.008839 | -0.136338 |
| C  | -0.132847 | -1.840292 | -1.334561 |
| C  | -5.544651 | 2.228830  | 1.256815  |
| C  | -3.458291 | -1.097077 | -2.094233 |
| C  | -4.103191 | 1.980465  | -1.587661 |
| C  | -4.493437 | -1.263010 | 0.296552  |
| C  | -4.033190 | -0.518645 | -0.839137 |
| C  | -4.334543 | 0.864825  | -0.613459 |
| C  | -4.991564 | 0.971361  | 0.656351  |
| C  | -5.091320 | -0.341276 | 1.216000  |
| H  | -0.416969 | 0.216655  | -3.277738 |
| H  | 1.206833  | -0.576502 | 2.096791  |
| H  | -0.524089 | 2.602728  | -1.137454 |
| H  | 0.410644  | -2.595271 | 0.740091  |
| H  | -0.443290 | -2.157911 | -2.314634 |
| H  | 1.278362  | 2.289167  | 0.661541  |
| H  | -4.403005 | -3.056489 | 1.500262  |
| H  | -5.330212 | -3.236391 | 0.003606  |
| H  | -3.560890 | -3.180971 | -0.053914 |
| H  | -5.683582 | 0.115415  | 3.244697  |
| H  | -6.833545 | -0.904289 | 2.367497  |
| H  | -5.316961 | -1.595318 | 2.962704  |
| H  | -2.749740 | -0.403686 | -2.566753 |
| H  | -4.245493 | -1.316565 | -2.834712 |
| H  | -2.926328 | -2.037102 | -1.896400 |
| H  | -4.957993 | 2.102045  | -2.273812 |
| H  | -3.212927 | 1.798625  | -2.204465 |
| H  | -3.962755 | 2.943506  | -1.077299 |
| H  | -6.591476 | 2.395906  | 0.952977  |
| H  | -4.974156 | 3.114136  | 0.944185  |
| H  | -5.530012 | 2.196692  | 2.354921  |

[Ni(GaCp\*)<sub>2</sub>(C<sub>2</sub>H<sub>4</sub>)<sub>2</sub>]:

|    |           |           |           |
|----|-----------|-----------|-----------|
| Ga | -2.275809 | 0.536745  | 0.040331  |
| Ni | 0.085831  | 0.627666  | -0.177548 |
| C  | 0.720815  | 1.459418  | 1.621597  |
| C  | 0.966047  | 2.306271  | 0.538210  |
| C  | 1.143557  | 0.676608  | -1.899106 |
| C  | -0.119888 | 0.142663  | -2.176112 |
| H  | 2.007297  | 0.023687  | -1.761208 |
| H  | 1.379642  | 1.705214  | -2.173319 |
| H  | -0.260823 | -0.931915 | -2.288465 |

|    |           |           |           |
|----|-----------|-----------|-----------|
| H  | -0.873445 | 0.758175  | -2.668303 |
| C  | -4.602632 | 0.422760  | -0.458211 |
| C  | -4.408804 | -0.229220 | 0.807051  |
| C  | -4.991390 | 0.208997  | 2.116221  |
| H  | -4.377819 | -0.120796 | 2.965172  |
| H  | -6.001697 | -0.205775 | 2.263570  |
| H  | -5.078504 | 1.302192  | 2.176552  |
| C  | -3.628747 | -1.406173 | 0.577313  |
| C  | -3.343811 | -1.485695 | -0.822021 |
| C  | -3.940758 | -0.356899 | -1.463152 |
| C  | -3.933249 | -0.061051 | -2.932463 |
| H  | -3.056364 | -0.495470 | -3.429597 |
| H  | -4.827534 | -0.470181 | -3.429515 |
| H  | -3.921271 | 1.019723  | -3.129005 |
| C  | -5.433536 | 1.645952  | -0.699209 |
| H  | -5.432698 | 2.316494  | 0.170572  |
| H  | -6.483694 | 1.381904  | -0.904996 |
| H  | -5.069695 | 2.220795  | -1.561459 |
| Ga | 0.334976  | -1.514361 | 0.741381  |
| C  | 0.842542  | -3.863229 | 0.795384  |
| C  | 1.005591  | -3.334774 | 2.119676  |
| C  | 0.236389  | -3.753171 | 3.335216  |
| H  | 0.161827  | -2.939255 | 4.068808  |
| H  | 0.721048  | -4.603771 | 3.841255  |
| H  | -0.785235 | -4.066337 | 3.082095  |
| C  | 2.095473  | -2.404093 | 2.090749  |
| C  | 2.600659  | -2.355466 | 0.753231  |
| C  | 1.824652  | -3.251080 | -0.048267 |
| C  | 2.017253  | -3.520922 | -1.510064 |
| H  | 2.396958  | -2.637128 | -2.039933 |
| H  | 2.738025  | -4.336789 | -1.679452 |
| H  | 1.076224  | -3.814458 | -1.994192 |
| C  | -0.129320 | -4.929408 | 0.392375  |
| H  | -1.067369 | -4.865114 | 0.960212  |
| H  | 0.287567  | -5.934310 | 0.567813  |
| H  | -0.383777 | -4.866612 | -0.673672 |
| C  | -3.192613 | -2.409018 | 1.598922  |
| H  | -3.269897 | -2.012165 | 2.619211  |
| H  | -2.144115 | -2.709430 | 1.441534  |
| H  | -3.802517 | -3.325583 | 1.553151  |
| C  | -2.554153 | -2.578414 | -1.471088 |
| H  | -1.587746 | -2.733050 | -0.962846 |
| H  | -2.342368 | -2.354792 | -2.523848 |
| H  | -3.091586 | -3.538929 | -1.437907 |
| C  | 2.649544  | -1.661643 | 3.268525  |
| H  | 1.866502  | -1.400938 | 3.993312  |
| H  | 3.143760  | -0.729702 | 2.963151  |
| H  | 3.400637  | -2.264188 | 3.804423  |
| C  | 3.744886  | -1.510832 | 0.282949  |
| H  | 3.741262  | -0.519208 | 0.756320  |
| H  | 3.710478  | -1.355812 | -0.803180 |
| H  | 4.714611  | -1.979950 | 0.513358  |

|   |           |          |          |
|---|-----------|----------|----------|
| H | 0.281528  | 3.122762 | 0.301781 |
| H | 1.974621  | 2.409516 | 0.137196 |
| H | -0.143279 | 1.608474 | 2.267744 |
| H | 1.541244  | 0.899783 | 2.071845 |

[Ni(GaCp\*)<sub>2</sub>(C<sub>2</sub>H<sub>2</sub>)<sub>2</sub>]:

|    |           |           |           |
|----|-----------|-----------|-----------|
| Ga | 0.148443  | -1.550296 | 1.122315  |
| Ga | -2.313291 | 0.392538  | 0.062593  |
| Ni | -0.077635 | 0.871723  | -0.042174 |
| C  | 3.368430  | -1.210874 | 0.064874  |
| C  | 2.925760  | -1.782458 | 3.158094  |
| C  | -2.595612 | -2.737377 | -1.297430 |
| C  | -3.484435 | -2.352378 | 1.698690  |
| C  | -0.020285 | -5.085209 | 0.501321  |
| C  | 1.515877  | -3.214401 | -1.596419 |
| C  | 1.582701  | -3.111682 | -0.102451 |
| C  | 2.402067  | -2.200055 | 0.638522  |
| C  | 2.213367  | -2.471354 | 2.033469  |
| C  | 0.834193  | -4.194145 | 3.427899  |
| C  | 1.294621  | -3.561206 | 2.150434  |
| C  | 0.903508  | -3.953746 | 0.835912  |
| C  | -5.238433 | 1.701224  | -1.005065 |
| C  | -3.712894 | -0.236710 | -3.007697 |
| C  | -3.854619 | -0.450035 | -1.531339 |
| C  | -3.376612 | -1.569754 | -0.780411 |
| C  | -3.747138 | -1.381241 | 0.590220  |
| C  | -5.107971 | 0.413400  | 1.923572  |
| C  | -4.453306 | -0.133815 | 0.692099  |
| C  | -4.520916 | 0.441719  | -0.627541 |
| C  | 0.002653  | 0.173090  | -1.873257 |
| C  | 1.080999  | 0.774520  | -1.605152 |
| C  | 1.202807  | 1.868522  | 1.048882  |
| C  | 0.084702  | 1.893269  | 1.631795  |
| H  | 2.243382  | 2.126780  | 0.935055  |
| H  | -0.557974 | 2.172864  | 2.450794  |
| H  | 2.069546  | 1.135654  | -1.838733 |
| H  | -0.613927 | -0.392816 | -2.553553 |
| H  | 4.391951  | -1.619386 | 0.037362  |
| H  | 3.095175  | -0.937180 | -0.961445 |
| H  | 3.402320  | -0.284975 | 0.655664  |
| H  | 3.892959  | -2.263265 | 3.379335  |
| H  | 3.133319  | -0.730235 | 2.920513  |
| H  | 2.335968  | -1.800847 | 4.084603  |
| H  | -3.205691 | -3.653213 | -1.318372 |
| H  | -2.229203 | -2.563017 | -2.316651 |
| H  | -1.720723 | -2.942069 | -0.660849 |
| H  | -4.234517 | -3.159172 | 1.703386  |
| H  | -2.493601 | -2.818279 | 1.596507  |
| H  | -3.516148 | -1.866480 | 2.682128  |
| H  | -0.460179 | -4.969143 | -0.498158 |
| H  | 0.506434  | -6.053651 | 0.509486  |

|   |           |           |           |
|---|-----------|-----------|-----------|
| H | -0.848227 | -5.165962 | 1.220430  |
| H | 0.545833  | -3.606621 | -1.932140 |
| H | 2.291732  | -3.889999 | -1.992281 |
| H | 1.655479  | -2.234891 | -2.072232 |
| H | -0.192600 | -4.577254 | 3.344525  |
| H | 1.473397  | -5.045902 | 3.713381  |
| H | 0.854173  | -3.481480 | 4.263645  |
| H | -4.766074 | 2.195442  | -1.864153 |
| H | -6.284015 | 1.492830  | -1.283181 |
| H | -5.260101 | 2.422058  | -0.177421 |
| H | -3.481000 | 0.809288  | -3.250012 |
| H | -4.641871 | -0.496348 | -3.538976 |
| H | -2.914628 | -0.858795 | -3.431980 |
| H | -5.147843 | 1.510474  | 1.910796  |
| H | -6.144304 | 0.050758  | 2.013271  |
| H | -4.576973 | 0.109516  | 2.834886  |

[Ni(GaCp\*)<sub>3</sub>(C<sub>2</sub>H<sub>4</sub>)]:

|    |           |           |           |
|----|-----------|-----------|-----------|
| Ni | 0.327131  | 0.611410  | -0.540698 |
| C  | 0.034266  | 0.060394  | -2.467788 |
| C  | 0.879672  | 1.178174  | -2.396548 |
| H  | -1.020976 | 0.174968  | -2.719129 |
| H  | 0.448917  | -0.929664 | -2.660339 |
| H  | 0.494117  | 2.181950  | -2.580552 |
| H  | 1.957374  | 1.061990  | -2.520376 |
| Ga | 0.261985  | -1.413497 | 0.491069  |
| C  | 0.367448  | -3.614414 | -0.497195 |
| C  | -0.062076 | -3.714070 | 0.867207  |
| C  | -1.348221 | -4.311904 | 1.348046  |
| H  | -1.652270 | -3.899097 | 2.318859  |
| H  | -1.255149 | -5.402878 | 1.474076  |
| H  | -2.171283 | -4.137178 | 0.642580  |
| C  | 1.021668  | -3.269054 | 1.705903  |
| C  | 2.109137  | -2.897613 | 0.851529  |
| C  | 1.700794  | -3.104523 | -0.502840 |
| C  | 2.546012  | -2.803173 | -1.701624 |
| H  | 2.999351  | -1.803510 | -1.632778 |
| H  | 3.368177  | -3.528666 | -1.807010 |
| H  | 1.960515  | -2.838065 | -2.628799 |
| C  | -0.439775 | -4.004361 | -1.697124 |
| H  | -1.515425 | -3.872255 | -1.522035 |
| H  | -0.280488 | -5.061756 | -1.962296 |
| H  | -0.175588 | -3.404192 | -2.577654 |
| C  | 1.025003  | -3.301563 | 3.203710  |
| H  | 0.048441  | -3.019492 | 3.620993  |
| H  | 1.772901  | -2.615986 | 3.622267  |
| H  | 1.260186  | -4.309305 | 3.582002  |
| C  | 3.450228  | -2.375209 | 1.265032  |
| H  | 3.515313  | -2.245392 | 2.351377  |
| H  | 3.668237  | -1.400441 | 0.800450  |
| H  | 4.254884  | -3.064290 | 0.965692  |

|    |           |           |           |
|----|-----------|-----------|-----------|
| Ga | 1.680233  | 1.637719  | 0.975312  |
| C  | 0.947842  | 3.237845  | 2.654717  |
| C  | 2.232906  | 3.618439  | 2.157174  |
| C  | 2.573340  | 4.902111  | 1.463807  |
| H  | 3.412864  | 4.775968  | 0.767349  |
| H  | 2.863913  | 5.682422  | 2.185389  |
| H  | 1.723291  | 5.290316  | 0.887579  |
| C  | 3.163999  | 2.575440  | 2.495190  |
| C  | 2.440258  | 1.556011  | 3.206760  |
| C  | 1.073804  | 1.963962  | 3.291476  |
| C  | -0.054957 | 1.181210  | 3.885524  |
| H  | 0.211041  | 0.123934  | 4.012990  |
| H  | -0.351806 | 1.571170  | 4.871854  |
| H  | -0.942716 | 1.217759  | 3.236406  |
| C  | -0.325732 | 4.010081  | 2.527888  |
| H  | -0.229404 | 4.839792  | 1.816752  |
| H  | -0.639021 | 4.432279  | 3.495355  |
| H  | -1.148858 | 3.368094  | 2.171421  |
| Ga | -1.691413 | 1.417298  | 0.283781  |
| C  | -3.899362 | 1.092024  | -0.653672 |
| C  | -4.000862 | 2.082697  | 0.376082  |
| C  | -4.424616 | 3.507891  | 0.193622  |
| H  | -3.965238 | 4.167362  | 0.942635  |
| H  | -5.517068 | 3.619546  | 0.290177  |
| H  | -4.147254 | 3.890202  | -0.797972 |
| C  | -3.709902 | 1.448495  | 1.630846  |
| C  | -3.804127 | 2.103591  | 2.974803  |
| H  | -3.474265 | 3.151092  | 2.943536  |
| H  | -3.191079 | 1.589335  | 3.726246  |
| H  | -4.841743 | 2.103666  | 3.346325  |
| C  | -3.425284 | 0.070927  | 1.370245  |
| C  | -3.060918 | -0.979800 | 2.371703  |
| H  | -2.877876 | -0.549339 | 3.364208  |
| H  | -2.144905 | -1.517723 | 2.073391  |
| H  | -3.855340 | -1.734923 | 2.478074  |
| C  | -3.542678 | -0.147231 | -0.037764 |
| C  | -3.316956 | -1.456585 | -0.724786 |
| H  | -2.446462 | -1.980289 | -0.301114 |
| H  | -4.185577 | -2.127049 | -0.622694 |
| H  | -3.123913 | -1.325766 | -1.797086 |
| C  | -4.159389 | 1.313151  | -2.112674 |
| H  | -3.879784 | 2.328120  | -2.425996 |
| H  | -5.225161 | 1.179312  | -2.358827 |
| H  | -3.592701 | 0.608983  | -2.736529 |
| C  | 4.644539  | 2.607742  | 2.267607  |
| H  | 5.166460  | 3.093303  | 3.108030  |
| H  | 4.904371  | 3.166275  | 1.358635  |
| H  | 5.062685  | 1.597450  | 2.165988  |
| C  | 3.032264  | 0.325836  | 3.819068  |
| H  | 3.930326  | -0.004507 | 3.282154  |
| H  | 2.318161  | -0.508430 | 3.816517  |
| H  | 3.323039  | 0.502108  | 4.867014  |

[Ni(GaCp\*)<sub>3</sub>(C<sub>2</sub>H<sub>2</sub>)]:

|    |           |           |           |
|----|-----------|-----------|-----------|
| Ga | -1.757547 | 1.332707  | 0.341842  |
| Ga | 1.641039  | 1.776386  | 0.854139  |
| Ga | 0.353032  | -1.290696 | 0.779122  |
| Ni | 0.247535  | 0.680126  | -0.578077 |
| C  | 2.802756  | 0.240520  | 3.681561  |
| C  | 4.624494  | 2.467853  | 2.231191  |
| C  | -4.138973 | 1.150254  | -2.106055 |
| C  | -3.370940 | -1.562730 | -0.534807 |
| C  | -3.594834 | -0.209347 | 0.061138  |
| C  | -3.155545 | -0.910892 | 2.520294  |
| C  | -3.479772 | 0.090190  | 1.455375  |
| C  | -3.839247 | 2.225733  | 2.929127  |
| C  | -3.722752 | 1.490834  | 1.629538  |
| C  | -4.368318 | 3.477823  | 0.055731  |
| C  | -3.978145 | 2.057794  | 0.330347  |
| C  | -3.907279 | 0.999085  | -0.633614 |
| C  | -0.255953 | 4.179255  | 2.418660  |
| C  | -0.158915 | 1.296924  | 3.764617  |
| C  | 1.003318  | 2.039016  | 3.186195  |
| C  | 2.339693  | 1.544552  | 3.113392  |
| C  | 3.140971  | 2.523484  | 2.434590  |
| C  | 2.724826  | 4.915711  | 1.460030  |
| C  | 2.282314  | 3.634144  | 2.098230  |
| C  | 0.964996  | 3.327148  | 2.569830  |
| C  | 3.589354  | -2.457986 | 1.398704  |
| C  | 1.209957  | -3.639809 | 3.230943  |
| C  | -0.359777 | -3.605038 | -1.693788 |
| C  | 2.595864  | -2.433754 | -1.591866 |
| C  | 1.778242  | -2.861650 | -0.414059 |
| C  | 2.222313  | -2.868650 | 0.944723  |
| C  | 1.168032  | -3.399800 | 1.752770  |
| C  | -1.205553 | -4.381439 | 1.315917  |
| C  | 0.071683  | -3.725758 | 0.887783  |
| C  | 0.451916  | -3.393507 | -0.452372 |
| C  | 0.942175  | 0.430083  | -2.360269 |
| C  | -0.304109 | 0.189165  | -2.361627 |
| H  | 1.894702  | 0.509575  | -2.863242 |
| H  | -1.213312 | -0.088192 | -2.874811 |
| H  | 2.908195  | 0.299584  | 4.776463  |
| H  | 2.087440  | -0.566738 | 3.465031  |
| H  | 3.774597  | -0.059145 | 3.272171  |
| H  | 4.982504  | 1.434349  | 2.135858  |
| H  | 4.932669  | 3.009654  | 1.327237  |
| H  | 5.158664  | 2.921977  | 3.081173  |
| H  | -3.706309 | 0.314021  | -2.669696 |
| H  | -5.214474 | 1.179245  | -2.342144 |
| H  | -3.694432 | 2.075764  | -2.496696 |
| H  | -3.288942 | -1.518436 | -1.627514 |
| H  | -4.192929 | -2.253630 | -0.290788 |
| H  | -2.440451 | -2.010307 | -0.154558 |

|   |           |           |           |
|---|-----------|-----------|-----------|
| H | -4.003391 | -1.587951 | 2.708483  |
| H | -2.296285 | -1.537198 | 2.231446  |
| H | -2.901763 | -0.425042 | 3.470501  |
| H | -4.894938 | 2.329204  | 3.227273  |
| H | -3.323677 | 1.700063  | 3.742490  |
| H | -3.420999 | 3.240118  | 2.870258  |
| H | -4.065138 | 3.793558  | -0.951294 |
| H | -5.460166 | 3.612159  | 0.124193  |
| H | -3.910704 | 4.171640  | 0.773638  |
| H | -1.110189 | 3.592104  | 2.042508  |
| H | -0.561247 | 4.623006  | 3.378690  |
| H | -0.090391 | 5.000497  | 1.710512  |
| H | -1.108788 | 1.748005  | 3.453920  |
| H | -0.135508 | 1.294248  | 4.865678  |
| H | -0.168720 | 0.246796  | 3.431934  |
| H | 1.916586  | 5.383784  | 0.883092  |
| H | 3.052256  | 5.645459  | 2.217807  |
| H | 3.568801  | 4.757741  | 0.775683  |
| H | 4.349062  | -3.193103 | 1.087955  |
| H | 3.887320  | -1.488028 | 0.972482  |
| H | 3.645250  | -2.373177 | 2.490549  |
| H | 1.507396  | -4.675059 | 3.465475  |
| H | 1.928243  | -2.976269 | 3.731022  |
| H | 0.228799  | -3.473367 | 3.697484  |
| H | -0.251005 | -2.762359 | -2.390703 |
| H | -0.048258 | -4.517264 | -2.227702 |
| H | -1.428101 | -3.711429 | -1.466587 |
| H | 1.958750  | -2.153583 | -2.439518 |
| H | 3.266788  | -3.241002 | -1.929270 |
| H | 3.223516  | -1.564142 | -1.351729 |
| H | -2.024619 | -4.179510 | 0.613217  |
| H | -1.094279 | -5.476500 | 1.376930  |
| H | -1.529463 | -4.036059 | 2.307858  |

## References

1. F. Neese, *Wiley Interdiscip. Rev. Comput. Mol. Sci.*, 2012, **2**, 73-78.
2. A. D. Becke, *Phys. Rev. A*, 1988, **38**, 3098-3100.
3. J. P. Perdew, *Phys. Rev. B*, 1986, **33**, 8822-8824.
4. S. Grimme, J. Antony, S. Ehrlich and H. Krieg, *J. Chem. Phys.*, 2010, **132**, 154104.
5. S. Grimme, S. Ehrlich and L. Goerigk, *J. Comput. Chem.*, 2011, **32**, 1456-1465.
6. F. Weigend and R. Ahlrichs, *Phys. Chem. Chem. Phys.*, 2005, **7**, 3297-3305.
7. F. Neese, F. Wennmoths, A. Hansen and U. Becker, *J. Chem. Phys.*, 2009, **356**, 98-109.
8. E. D. Glendening, A. E. Reed, J. E. Carpenter and F. Weinhold, *Journal, NBO Version 3.1 Gaussian Inc.*
9. M. J. Frisch, G. W. Trucks, H. B. Schlegel, G. E. Scuseria, M. A. Robb, J. R. Cheeseman, G. Scalmani, V. Barone, B. Mennucci, G. A. Petersson, H. Nakatsuji, M. Caricato, X. Li, H. P. Hratchian, A. F. Izmaylov, J. Bloino, G. Zheng, J. L. Sonnenberg, M. Hada, M. Ehara, K. Toyota, R. Fukuda, J. Hasegawa, M. Ishida, T. Nakajima, Y. Honda, O. Kitao, H. Nakai, T. Vreven, J. A. Montgomery, J. E. Peralta, F. Ogliaro, M. Bearpark, J. J. Heyd, E. Brothers, K. N. Kudin, V. N. Staroverov, R. Kobayashi, J. Normand, K. Raghavachari, A. Rendell, J. C. Burant, S. S. Iyengar, J. Tomasi, M. Cossi, N. Rega, J. M. Millam, M. Klene, J. E. Knox, J. B. Cross, V. Bakken, C. Adamo, J. Jaramillo, R. Gomperts, R. E. Stratmann, O. Yazyev, A. J. Austin, R. Cammi, C. Pomelli, J. W. Ochterski, R. L. Martin, K. Morokuma, V. G. Zakrzewski, G. A. Voth, P. Salvador, J. J. Dannenberg, S. Dapprich, A. D. Daniels, Farkas, J. B. Foresman, J. V. Ortiz, J. Cioslowski and D. J. Fox, *Journal*, 2009, DOI: citeulike-article-id:9096580.
10. T. Lu and F. Chen, *J. Comput. Chem.*, 2012, **33**, 580-592.
11. M. Parafiniuk and M. P. Mitoraj, *J. Mol. Model*, 2014, **20**, 2272.
12. A. Michalak, M. Mitoraj and T. Ziegler, *J. Phys. Chem. A.*, 2008, **112**, 1933-1939.
13. M. P. Mitoraj, A. Michalak and T. Ziegler, *J. Chem. Theory Comput.*, 2009, **5**, 962-975.
14. G. te Velde, F. M. Bickelhaupt, E. J. Baerends, C. Fonseca Guerra, S. J. A. van Gisbergen, J. G. Snijders and T. Ziegler, *J. Comput. Chem.*, 2001, **22**, 931-967.
15. J. G. Snijders, P. Vernooijs and E. J. Baerends, *Atomic Data and Nuclear Data Tables*, 1981, **26**, 483-509.
16. C. Chang, M. Pelissier and P. Durand, *Phys. Scr.*, 1986, **34**, 394.
17. J. L. Heully, I. Lindgren, E. Lindroth, S. Lundqvist and A. M. Martensson-Pendrill, *J. Phys. B.: At. Mol. Phys.*, 1986, **19**, 2799.
18. J. G. Snijders and A. J. Sadlej, *Chem. Phys. Lett.*, 1996, **252**, 51-61.
19. E. v. Lenthe, E. J. Baerends and J. G. Snijders, *J. Chem. Phys.*, 1993, **99**, 4597-4610.
20. E. van Lenthe, R. van Leeuwen, E. J. Baerends and J. G. Snijders, *Int. J. Quantum Chem.*, 1996, **57**, 281-293.
21. N. Hebben, H.-J. Himmel, G. Eickerling, C. Herrmann, M. Reiher, V. Herz, M. Presnitz and W. Scherer, *Chem. Eur. J.*, 2007, **13**, 10078-10087.
22. B. F. Straub and C. Gollub, *Chem. Eur. J.*, 2004, **10**, 3081-3090.
23. K. Freitag, M. Molon, P. Jerabek, K. Dilchert, C. Rösler, R. W. Seidel, C. Gemel, G. Frenking and R. A. Fischer, *Chem. Sci.*, 2016, **7**, 6413-6421.
24. T. Steinke, C. Gemel, M. Cokoja, M. Winter and R. A. Fischer, *Angew. Chem. Int. Ed.*, 2004, **43**, 2299-2302.
25. J. Hornung, J. Weßing, P. Jerabek, C. Gemel, A. Pöthig, G. Frenking and R. A. Fischer, *Inorg. Chem.*, 2018, **57**, 12657-12664.
